1 **Discrete and coordinated encoding of punishment contingent on rewarded actions by**  
2 **prefrontal cortex and VTA**

3 Junchol Park<sup>1</sup> and Bitá Moghaddam<sup>2</sup>

4

5 Affiliations:

6 1 Department of Neuroscience, University of Pittsburgh, Pittsburgh PA

7 Present affiliation: Janelia Research Campus, Howard Hughes Medical Institute, Ashburn, VA

8 2 Department of Behavioral Neuroscience, Oregon Health and Science University, Portland OR

9 \*Correspondence to: Bitá Moghaddam, email address: [bita@ohsu.edu](mailto:bita@ohsu.edu)

10 Keywords: Punishment, Anxiety, Reward, Instrumental action, Neural synchrony, Dopamine

11 **Abstract**

12 Actions motivated by a rewarding outcome are often associated with a risk of punishment. Little  
13 is known about the neural representation of punishment that is contingent on reward-guided  
14 behavior. We modeled this circumstance by using a task where actions were consistently  
15 rewarded but probabilistically punished. Spike activity and local field potentials were recorded  
16 during this task simultaneously from VTA and mPFC, two reciprocally connected regions  
17 implicated in both reward-seeking and aversive behavioral states. At the single unit level, we  
18 found that ensembles of VTA and mPFC neurons encode the contingency between action and  
19 punishment. At the network level, we found that coherent theta oscillations synchronize the VTA  
20 and mPFC in a bottom-up direction, effectively phase-modulating the neuronal spike activity in  
21 the two regions during punishment-free actions. This synchrony declined as a function of  
22 punishment contingency, suggesting that during reward-seeking actions, risk of punishment  
23 diminishes VTA-driven neural synchrony between the two regions.

## 24 **Introduction**

25 Goal-directed actions aimed at obtaining a reward often involve exposure to an aversive event  
26 or punishment. For example, foraging for food in the wild may result in encountering a predator.  
27 In a causally and socially complex world, appropriate representation of punishment that is  
28 contingent on reward-seeking actions is critical for survival and optimal action selection. Deficits  
29 in this representation may be associated with detrimental behavioral patterns observed in  
30 addictive disorders while exaggerated representation of punishment may be linked to anxiety-  
31 related disorders (Bechara et al., 2000; Gillan et al., 2016; Hartley and Phelps, 2012; Lee, 2013;  
32 Mineka et al., 1998).

33         How is punishment that is contingent on reward-seeking actions represented by the  
34 brain? To begin to address this question, we focused on the ventral tegmental area (VTA) and  
35 the medial prefrontal cortex (mPFC). Neurons in the VTA including dopamine (DA) and non-  
36 dopamine neurons are critical components of the reward circuitry including reward-mediated  
37 actions (Cohen et al., 2012; Matsumoto et al., 2016; Roesch et al., 2007; Schultz, 1998; Tan et  
38 al., 2012; van Zessen et al., 2012; Wise, 2004). We, therefore, hypothesized that ensembles of  
39 VTA neurons represent risk of punishment associated with reward-mediated behavior.

40 Importance of VTA notwithstanding, the mPFC is also implicated in encoding of reward and  
41 reward-guided action selection (Barraclough et al., 2004; Buschman et al., 2012; Kobayashi et  
42 al., 2006; Powell and Redish, 2016; Rich and Shapiro, 2009), as well as control of aversive and  
43 anxiety-like behavior (Adhikari et al., 2010; Karalis et al., 2016b; Kumar et al., 2014; Likhtik et  
44 al., 2014; Park et al., 2016; Ye et al., 2016). At a circuit level, the mPFC and VTA (both DA and  
45 non-DA neurons) send reciprocal projections to each other (Berger et al., 1976; Carr and  
46 Sesack, 2000a, b). The VTA neurons projecting to mPFC have been shown to respond to  
47 stressful and anxiogenic perturbations with a greater degree of sensitivity compared to the  
48 mesolimbic or mesostriatal projections (Abercrombie et al., 1989; Bradberry et al., 1991;  
49 Moghaddam et al., 1990; Thierry et al., 1976). Furthermore, photostimulation of the VTA

50 dopaminergic input to the mPFC elicits anxiety-like behavior (Gunaydin et al., 2014; Lammel et  
51 al., 2012), suggesting a more causal role for this neural circuit in aversive behavior. Given this,  
52 we further hypothesized that the interaction between VTA and mPFC provides a dynamic  
53 representation of punishment contingent on a reward-seeking action and punishment-based  
54 modulation of that action.

55 To test these hypotheses, we first designed and validated a task that allowed us to  
56 assess reward-directed instrumental behavior in the absence or presence of action-contingent  
57 punishment in the same recording session. The latter criterion was critical because it allowed us  
58 to track the activity of the same ensembles of neurons as the punishment contingency  
59 associated with the same instrumental behavior changed. The task was designed so that the  
60 action always procured a reward but the same action probabilistically led to punishment with  
61 block-wise varying degrees of contingency. Thus, different blocks had varying action-  
62 punishment contingency whereas the action-reward contingency remained constant. We then  
63 recorded single unit activity and local field potentials (LFP) from the VTA and mPFC  
64 simultaneously during this task. The simultaneous recording allowed us to characterize and  
65 compare the inter- and intra-regional neural codes for punishment and punishment-based  
66 modulation of instrumental action.

67 At the single unit level, we found that VTA and mPFC neurons encode action-  
68 punishment contingency and punishment-based behavioral modulation. At the network level, we  
69 found that coherent theta oscillations synchronize the VTA and mPFC in a bottom-up direction,  
70 effectively phase-modulating the neuronal spike activity in the two regions during punishment-  
71 free actions. This oscillation-mediated neural synchrony declined as a function of action-  
72 punishment contingency, suggesting that desynchronization of the two regions signals  
73 punishment.

## 74 **Results**

### 75 **Anxiety-like behavioral changes by punishment contingent on the action**

76 The conditional probability of punishment contingent on the action – termed ‘punishment’  
77 hereafter for simplicity – induced anxiety-like aversive behavioral changes (Figure 1a-b), as the  
78 mean response time (RT) markedly increased as a function of punishment (Figure 1c; GLM  
79 repeated measures,  $F_{2,32} = 24.94$ ,  $p < 0.001$ ). We also measured time spent in immobility  
80 during RT, a widely used behavioral measure of anxiety in rodents, and observed a significant  
81 increase in immobile RT (Figure 1c; GLM repeated measures,  $F_{2,32} = 22.44$ ,  $p < 0.001$ ),  
82 demonstrating that the increased RT may involve anxiety. The increase in RT could not be  
83 explained by changes in motivation for the reward, as the time for reward retrieval (reward RT)  
84 remained consistent across blocks regardless of punishment (Figure 1c inset; GLM repeated  
85 measures,  $F_{2,32} = 2.97$ ,  $p = 0.07$ ). When animals performed the same number of trials and  
86 blocks in the absence of punishment throughout a session, namely ‘no-shock control session’,  
87 the mean RT and reward RT did not differ across blocks (Figure 1d).

88 The punishment-induced increase in RT was pertinent to anxiety because an anxiolytic  
89 drug, diazepam, reduced the increase in RT. Systemic pretreatment of diazepam (2 mg/kg)  
90 significantly averted increase in RT of block 3, compared with saline-pretreatment data (Figure  
91 1e; Repeated measures ANOVA,  $F_{4,48} = 3.27$ ,  $p = 0.019$ ; *post hoc test*, block 3,  $p$  values <  
92 0.01). Diazepam or saline injected animals showed equivalent levels of reward RT (Figure 1e  
93 inset; Repeated measures ANOVA,  $F_{4,48} = 0.34$ ,  $p = 0.852$ ; *post hoc test*,  $p$  values > 0.51).

94

### 95 **Individual neuronal encoding of punishment**

96 During task performance, 167 mPFC and 102 VTA single units were recorded from  
97 histologically verified electrodes (Figure S1). For all single unit data analyses, we classified VTA  
98 units into putative dopamine (DA,  $n = 55$ ) and putative non-dopamine (non-DA,  $n = 47$ ) subtypes

99 (Figure S2, Experimental procedure). We first examined the trial-averaged neuronal activity of  
100 mPFC, VTA DA, and non-DA units to compare their general tuning properties during task events  
101 – cue onset, action, and reward delivery. Figure 2a shows peri-event neuronal activity averaged  
102 across all trials and blocks. The majority of VTA DA units displayed phasic excitatory responses  
103 at each task event as has been previously reported (Schultz et al., 1993), whereas non-DA and  
104 mPFC units showed weaker and temporally diffuse responses (Figure 2a-c; Repeated  
105 measures ANOVA, post-cue,  $F_{2, 266} = 22.05$ ; peri-action,  $F_{2, 266} = 43.78$ ; post-reward,  $F_{2, 266} =$   
106  $48.93$ ,  $p$  values  $< 0.001$ ).

107 We then examined modulation of single neuronal activity across blocks (Figure 2b-c).  
108 Some of mPFC, VTA DA, and non-DA single units modulated their peri-event firing rates across  
109 blocks as a function of action-punishment contingency. We therefore quantified individual  
110 neuronal encoding of punishment using a percent explained variance ( $\omega$ PEV) statistic  
111 (Buschman et al., 2012) – i.e., how much of total variance in a neuron’s firing rate across trials  
112 can be explained by punishment contingency varying across blocks (Experimental procedure).  
113 To identify punishment-encoding units, we compared the  $\omega$ PEV statistic of the original spike  
114 trains with the  $\omega$ PEV distribution of surrogate spike trains created by shuffling block labels  
115 (Figure 2d-e, Experimental procedure). Substantial proportions of units in both regions (mPFC,  
116 49 %; VTA DA, 65 %; VTA non-DA, 77 %) encoded punishment at the time of the action (Figure  
117 3a, S3). Likewise, units displayed more pronounced encoding of punishment at the time of the  
118 action, since the peri-action  $\omega$ PEVs appeared to be greater than that of the peri-cue or peri-  
119 reward epoch (Figure 3a). Therefore, subsequent analyses focused on the peri-action epoch.

120 mPFC, VTA DA, and non-DA units exhibited equivalent levels of punishment encoding in  
121 the peri-action epoch given that the main effect of unit groups was not significant ( $F_{2, 266} = 1.21$ ,  
122  $p = 0.30$ ). However, a significant interaction between time and unit groups was observed in the  
123 peri-action  $\omega$ PEV (Figure 3a; Repeated measures ANOVA,  $F_{38, 5054} = 2.68$ ,  $p < 0.001$ ), indicating

124 distinct time-varying patterns in encoding of punishment by different unit groups. We then  
125 examined the time course of individual neuronal encoding in the peri-action epoch. We  
126 recalculated the peri-action  $\omega$ PEV using a narrower moving window (50-ms width, 5-ms step) to  
127 reveal time points of individual neuronal encoding of punishment with a higher degree of  
128 temporal precision. VTA DA neuronal encoding appeared to be concentrated specifically around  
129 the time of the action, whereas non-DA and mPFC units displayed temporally diffuse patterns  
130 (Figure 3b). This result suggests that DA units may be involved in more precise signaling of  
131 action-punishment contingency whereas the mPFC and VTA non-DA units may represent more  
132 persistent effects of punishment on motivational/emotional states. Consistent with this function,  
133 substantial proportions of mPFC (31 %) and non-DA (32 %) units significantly modulated their  
134 baseline firing rates across blocks, suggesting representation of punishment on a larger  
135 temporal scale (Figure 3c). Fewer VTA DA units (14 %) modulated their baseline activity (Figure  
136 3c).

137 We examined the direction of activity modulation (excitation or inhibition) as a function of  
138 punishment. Similar proportions of mPFC units encoded punishment with bidirectional  
139 modulation of activity (Figure 4a), which resulted in a lack of net excitation or suppression of  
140 activity across blocks (Figure 4b; Repeated measures ANOVA,  $F_{2, 241} = 2.09$ ,  $p = 0.126$ ). The  
141 majority of VTA DA units encoded punishment contingency with an excitatory modulation of  
142 activity (Figure 4c) specifically at the time of the action (Figure 4d; Repeated measures ANOVA,  
143  $F_{2, 105} = 3.96$ ,  $p = 0.022$ ), but not during other task events. Similar to the DA units, the greater  
144 number of non-DA punishment-encoding units displayed an excitatory modulation of activity  
145 (Figure 4e) with a trend toward a net excitatory effect of the block (Figure 4f; Repeated  
146 measures ANOVA,  $F_{2, 105} = 2.94$ ,  $p = 0.057$ ).

147 To disentangle neuronal encoding of punishment from other confounding factors that  
148 may cause block-dependent changes in neuronal activity – such as satiety, fatigue, or

149 spontaneous changes over time, we performed a control experiment recording from 126 mPFC  
150 and 57 VTA single units (putative DA,  $n = 28$ ; putative non-DA,  $n = 29$ ) during performance of  
151 three consecutive punishment-free blocks. We observed a much weaker blockwise changes in  
152 firing rate indicating negligible impact of confounding factors on the neuronal encoding of  
153 punishment (Figure 5).

154 Taken together, these data indicate that both VTA and mPFC single neurons convey the  
155 information about action-punishment contingency. Moreover, we observed distinct temporal and  
156 directional tuning properties from mPFC, VTA DA, and non-DA neuronal subpopulations. This  
157 heterogeneity may enable the VTA-mPFC circuit to represent diverse motivational/emotional  
158 aspects of punishment.

159

### 160 **Contingency of punishment diminishes neural synchrony between VTA and mPFC**

161 At the neural circuit and network level, synchronous oscillations can provide temporal  
162 coordination among local and interregional neural groups, thereby promoting various cognitive,  
163 emotional, and motivational functions (Adhikari et al., 2010; Buschman et al., 2012; Fries, 2015;  
164 Karalis et al., 2016a; Kim et al., 2012; Likhtik et al., 2014). We examined whether such  
165 oscillation-mediated neural synchrony subserved encoding of reward-seeking action and  
166 punishment contingent on the action.

167 During punishment-free performance in block 1, theta oscillations in the frequency band  
168 of 5 to 15 Hz emerged in mPFC and VTA both preceding and during the action (Figure 6a-d).  
169 This theta oscillation was markedly reduced as a function of punishment contingency in both  
170 regions (Figure 6e-f). Of note, this change in theta oscillation observed before and during the  
171 action cannot be explained by the discrepancy in the animals' motor activity because they  
172 engaged in the action within this epoch. A significant interaction between punishment and  
173 frequency band was detected in LFP power during post-cue and pre-action time periods in both  
174 regions (Repeated measures ANOVA, VTA, post-cue,  $F_{52, 1092} = 5.11$ ; pre-action,  $F_{52, 1092} = 7.78$ ,



175  $p$  values  $< 0.001$ ; mPFC, post-cue,  $F_{52, 1872} = 1.60$ ,  $p = 0.005$ ; pre-action,  $F_{52, 1872} = 2.29$ ,  $p <$   
176  $0.001$ , Figure 6g-h). Theta oscillations appeared to be coherent between the two regions during  
177 the punishment-free action, but the coherence significantly reduced as a function of punishment  
178 (Figure 6i). A significant interaction between punishment and frequency band was observed in  
179 LFP coherence during the pre-action period (Repeated measures ANOVA, post-cue,  $F_{52, 1092} =$   
180  $0.93$ ,  $p = 0.62$ ; pre-action,  $F_{52, 1092} = 2.45$ ,  $p < 0.001$ ).

181 To examine mutual influences (directionality) of LFP time series between the two  
182 regions, we quantified Granger causal influences (GC) in VTA-to-mPFC and mPFC-to-VTA  
183 directions (Experimental procedure). During punishment-free action in block 1, the theta  
184 oscillation was driven by VTA, as mPFC was GC influenced by VTA significantly greater than  
185 the GC influence of the other direction (Figure 6j). A significant interaction between directionality  
186 and frequency band was observed in GC coefficients in all blocks, indicating that the oscillation  
187 directionality varied across frequency bands (Figure 6j; Repeated measures ANOVA, Block 1,  
188  $F_{25, 700} = 2.05$ ,  $p = 0.002$ ; Block 2,  $F_{25, 700} = 2.38$ ,  $p < 0.001$ ; Block 3,  $F_{25, 700} = 5.59$ ,  $p < 0.001$ ).

189 But importantly post hoc analysis revealed significantly greater VTA-to-mPFC directionality in  
190 frequency bands including the theta band in block 1, and the directionality became unclear in  
191 blocks 2 & 3 (Figure 6j, data not shown for block 2). Taken together, these results suggest that  
192 the VTA-driven theta oscillation entrains the VTA-mPFC circuit during punishment-free action.  
193 Decline in this entrainment may represent punishment contingent on the action, since power,  
194 coherence, and directionality of the theta oscillation declined as a function of punishment  
195 contingency. Analyses of no-shock control data revealed that these punishment-dependent  
196 changes in the VTA-mPFC theta oscillations were not evident in the absence of punishment  
197 (Figure S4).

198 **Punishment-induced reduction in local and interregional LFP–spike synchrony**

199 Synchronous oscillations can provide temporal coordination of spike activity of local and  
200 interregional neuron groups by creating rhythmic sequences of neuronal excitation and  
201 inhibition, thereby enhancing ‘neuronal communication’ between coherently timed neuron  
202 groups (Fries, 2015; Harris and Gordon, 2015). The presence of such LFP-mediated spike  
203 timing coordination was examined by measuring phase-locking of the neuronal spike activity to  
204 local and interregional theta oscillations in the peri-action epoch.

205         Within each region, substantial proportions of single units (37 % in VTA and 23 % in  
206 mPFC) that were subjected to the phase-locking analysis showed significant phase-locking to  
207 the local theta oscillation in the punishment-free block 1 according to Rayleigh’s z-test for non-  
208 uniformity of the spike phase distribution. Consistent with the temporally specific increase in the  
209 theta spectral power (Figure 6c-d), the phase synchrony arose during action from the baseline  
210 level in the phase-locked units in both regions (Figure 7a & d; Signed-rank test,  $p$  values <  
211 0.001). Enhanced phase-locking, albeit to a lesser degree, was observed even in units that  
212 failed the Rayleigh’s test (Figure 7a & d; Signed-rank test,  $p$  values < 0.001), indicating  
213 widespread influence of the theta oscillation on local neuronal spike timing. The temporal  
214 relationship (directionality) between the spike outputs and the theta oscillation was examined  
215 using a time-lagged phase-locking analysis (Likhtik et al., 2014; Spellman et al., 2015). The  
216 spike-LFP phase-locking was recalculated using spike times shifted relative to the local or  
217 interregional LFP to infer the directionality in the LFP-spike interaction. We found that in block 1  
218 greater proportions of units appeared to be phase-locked with negative time lags. The vast  
219 majority of phase-locked units (VTA, 74 %; mPFC, 67 %) had their maximum phase-locking  
220 values (PLVs; Experimental procedure) with a negative lag (Figure 7b & e; Signed-rank test,  $p$   
221 values < 0.005). These indicated an entrainment of spike timing by preceding cycles of the  
222 oscillation – i.e., directionality from the theta oscillation to the spike activity. To examine the  
223 modulation of LFP-spike phase-locking by punishment, we compared PLVs across different

224 blocks. A trend toward reduction in PLV was found in block 3 compared with block 1 in mPFC  
225 (Figure 7c; Signed-rank test,  $p = 0.077$ ), and a significant reduction was found in VTA (Figure  
226 7f;  $p = 0.006$ ). Likewise, a trend toward reduction in the proportion of phase-locked units was  
227 observed in block 3 compared with block 1 in mPFC (Figure 7b; Chi-square test,  $\chi^2_1 = 3.25$ ,  $p =$   
228  $0.071$ ), and a significant reduction was found in VTA (Figure 7e;  $\chi^2_1 = 4.31$ ,  $p = 0.038$ ). We next  
229 examined VTA DA and non-DA neuronal phase-locking separately. Greater fraction of DA units  
230 (45 %) appeared to be phase-locked compared with non-DA units (23 %) in block 1 (Figure 7g;  
231 Chi-square test,  $\chi^2_1 = 5.04$ ,  $p = 0.025$ ). The DA neuronal PLV in block 1 significantly declined as  
232 a function of punishment contingency in block 2 & 3 (Figure 7h; Signed-rank test,  $p$  values <  
233  $0.01$ ), whereas the non-DA neuronal PLV did not differ across blocks ( $p$  values >  $0.43$ ). These  
234 indicated that the punishment-induced reduction in the VTA neuronal phase-locking was  
235 predominately due to the reduction in DA neuronal synchrony.

236         Next we examined the interregional LFP-spike phase-locking between VTA and mPFC.  
237 Based on the Granger causal influence indicating VTA-to-mPFC directionality in theta  
238 oscillations, we anticipated stronger mPFC neuronal synchrony to the VTA theta oscillation than  
239 that of the other direction. Consistent with this, we found that a substantial proportion of mPFC  
240 units (31 %) were phase-locked to the VTA theta oscillation in block 1. A representative mPFC  
241 unit with significant phase-locking is shown in Figure 8a-b. The interregional spike-phase  
242 synchrony emerged during the action compared to the baseline (Figure 8c, Signed-rank test,  $p$   
243 values <  $0.001$ ). We examined directionality of the LFP-spike synchrony using the time-lagged  
244 phase-locking analysis. In block 1, the majority of phase-locked units had their peak PLVs with a  
245 negative lag (Figure 8d; Signed-rank test,  $p = 0.066$ ). Likewise, greater proportions of phase-  
246 locked units were observed on negative lags (Figure 8d, bottom). In addition, the mean PLV  
247 across negative time lags appeared to be greater than that of the positive lags (Figure 8e;  
248 Signed-rank test,  $p = 0.023$ ). These indicate mPFC neuronal entrainment to preceding VTA

249 theta oscillatory cycles – i.e., VTA-to-mPFC directionality. When compared across blocks, the  
250 mPFC neuronal entrainment by the VTA theta oscillation declined as a function of punishment  
251 contingency (Figure 8e-g, Signed-rank test,  $p = 0.003$ ). As the degree of phase-locking  
252 diminished, the VTA-to-mPFC directionality also declined (Figure 8d-e). We also examined the  
253 VTA neuronal phase-locking to the mPFC theta oscillation. The degree of VTA neuronal phase-  
254 locking to the mPFC theta oscillation appeared to be much weaker than the mPFC neuronal  
255 phase-locking to the VTA theta oscillation (Wilcoxon Rank-sum test,  $p < 0.001$ ), corroborating  
256 the VTA-to-mPFC directionality in the theta-oscillation-mediated spike phase modulation (Figure  
257 S5). The PLVs did not differ across different blocks in both DA and non-DA units (Figure S5).  
258 Analyses of no-shock control data showed unchanging neural synchrony across blocks in the  
259 absence of punishment (Figure S6-7).

260           In sum, we found a coherent theta oscillation temporarily synchronized the VTA-mPFC  
261 neural circuit during rewarded instrumental action. This synchrony declined as a function of  
262 punishment contingency (Figure 8h).

263 **Discussion**

264 To unravel the VTA and mPFC neural representation of punishment contingent on goal-directed  
265 behavior, we engaged animals in an instrumental task where an action consistently procured a  
266 reward but probabilistically led to punishment. Simultaneous recording from VTA and mPFC  
267 demonstrated that these regions use multiple coding structures, involving spike-rate and LFP-  
268 mediated neural synchrony, to represent punishment contingent on goal-directed actions. VTA  
269 and mPFC single neurons encoded the same action differently if that action was punishment-  
270 free versus punishment-prone, suggesting that these neurons encode the contingency between  
271 action and punishment. At the network level, coherent theta oscillations that emerged in mPFC  
272 and VTA during punishment-free actions declined during punishment-prone actions, indicating  
273 that risk of punishment disrupts the synchrony between the two regions associated with an  
274 appetitive state.

275

276 **Neurons encode action-punishment contingency on different timescales**

277 Using a novel behavioral paradigm, we modeled anxiety-like changes in instrumental actions as  
278 a function of action-punishment contingency. We found that the vast majority of VTA and mPFC  
279 neurons encode punishment by modulating their firing rates. Critically, the neuronal encoding  
280 was most pronounced at the time of the action as compared to other task events. This strongly  
281 suggested that neurons in both regions represented contingency between action and  
282 punishment.

283         Punishment influences behavior, and neuronal representation associated with that  
284 behavior, on multiple timescales (Cohen et al., 2015; Somerville et al., 2013). On short  
285 timescales, real-time neural processing of punishment may be important to signal contingency  
286 of punishment on a specific event in order to promote rapid behavioral adaptation. Our data  
287 suggest that VTA DA neuronal signaling may be involved in this context. DA neurons displayed  
288 phasic excitatory responses tightly linked to each of the task events (cue, action, and reward).

289 Importantly, the DA neuronal encoding of punishment was concentrated around the time of the  
290 action compared with other task epochs, suggesting that DA neuronal signaling of punishment  
291 may primarily reflect the action-punishment contingency. On longer timescales, punishment can  
292 elicit persistent changes in motivational and emotional states – e.g., changes in mood. We  
293 found that mPFC and VTA non-DA neurons display temporally diffuse encoding of punishment  
294 within the peri-action window. Likewise, many of the mPFC and non-DA neurons showed  
295 significant modulation of their baseline firing rates, suggesting that these neurons may encode  
296 punishment with persistent changes in activity. This sustained change in activity may be  
297 responsible for longer-lasting affective impact of punishment.

298

### 299 **Neurons display bidirectional encoding of action-punishment contingency**

300 Different subpopulations of punishment-encoding neurons in both regions encoded punishment  
301 by increasing or decreasing their peri-action firing rates. The direction of neuronal responses to  
302 appetitive vs aversive events is thought to carry information about motivational properties  
303 encoded by the neuronal activity. While heterogeneous response patterns have been widely  
304 observed in PFC neuronal encoding of punishment (Kobayashi et al., 2006; Matsumoto et al.,  
305 2007; Seo and Lee, 2009; Ye et al., 2016), there is some debate on whether the VTA DA  
306 neurons encode punishment with excitatory or inhibitory responses (Bromberg-Martin et al.,  
307 2010; Schultz, 2016). It has been demonstrated that reward prediction error (RPE)-coding DA  
308 neurons respond to appetitive (better-than-predicted) vs aversive (worse-than-predicted) events  
309 by excitation and inhibition, integrating information about appetitive and aversive events into a  
310 common currency of value (Eshel et al., 2016; Matsumoto et al., 2016; Mileykovskiy and  
311 Morales, 2011; Mirenowicz and Schultz, 1996; Roitman et al., 2008). We found that a subset of  
312 VTA DA neurons conforms to this pattern. These neurons responded to punishment-free (purely  
313 appetitive) actions with phasic excitation, which decreased as a function of punishment  
314 contingency.

315           In contrast, a greater proportion of DA neurons showed excitatory encoding of  
316 punishment; i.e., they treated appetitive and aversive components in the same direction, and  
317 responded to actions prone to punishment with further excitation. We observed that excitatory  
318 encoding of punishment contingency was more predominant among DA neurons, suggesting  
319 that the contingency of punishment is not simply encoded as reduced value of the action.  
320 Previous studies reported a subpopulation of DA neurons showing similar excitatory responses  
321 to appetitive and aversive stimuli (Brischoux et al., 2009; Joshua et al., 2008; Matsumoto and  
322 Hikosaka, 2009; Valenti et al., 2011). An excitatory DA neuronal encoding of aversive or neutral  
323 events has been interpreted as conveying motivational salience (Bromberg-Martin et al., 2010;  
324 Matsumoto and Hikosaka, 2009), detection (Nomoto et al., 2010), intensity (Fiorillo et al., 2013)  
325 of a sensory event, as well as generalization effect of rewarding stimuli (Kobayashi and Schultz,  
326 2014). Combination of these factors may comprise the excitatory DA neuronal encoding of  
327 punishment-prone actions we observed. Furthermore, the DA neuronal encoding of aversion  
328 has been suggested to depend on animals' behavioral state. A recent study demonstrated that  
329 DA neurons encoded aversive events with inhibition in a low reward context but with biphasic  
330 responses in a high reward context (Matsumoto et al., 2016). In addition, contrasting DA neural  
331 responses were observed based on how animals responded to an aversive event. DA  
332 concentration in the ventral striatum increased or decreased when rats displayed active  
333 avoidance or passive reaction (freezing) to shock-predicting cues (Oleson et al., 2012; Wenzel  
334 et al., 2015). These patterns of state dependency in DA neural responses to aversion are in line  
335 with our observation of excitatory encoding of punishment when risk was taken for reward in a  
336 highly rewarding context. Thus, our results are in support of the view that there are different  
337 modes of DA neuronal signaling of aversion depending on animals' behavioral state and/or the  
338 reward availability in the environment.

339           Punishment is an event of negative valence associated with avoidance but of high  
340 salience deserving prioritized attention. Both aspects of punishment need to be represented for

341 appropriate behavioral coping. Our observation of bidirectional encoding of punishment by  
342 distinct subpopulations of VTA DA, non-DA, and mPFC neurons suggests that different neuron  
343 groups may convey diverse motivational and emotional properties of punishment.

344

#### 345 **VTA-mPFC neural synchrony declines with punishment**

346 At the network level, we observed that coherent theta oscillation synchronized VTA and mPFC  
347 specifically during punishment-free actions, effectively phase-modulating the neuronal spike  
348 activity in the two regions. Analyses of the temporal relationship indicated that the neural  
349 synchrony arose in the VTA-to-mPFC direction. That is, the VTA driven bottom-up theta  
350 oscillation entrained mPFC LFPs and neuronal spike activity during punishment-free actions.  
351 The theta oscillation preferentially entrained DA neurons but much fewer non-DA neurons in the  
352 VTA. Considering the phasic excitatory responses of DA neurons during action, the theta  
353 oscillation-mediated neural synchrony may promote phase-coupling between VTA DA and  
354 mPFC neurons selectively during punishment-free actions. This phase-coupling diminished  
355 during punishment-prone actions. Thus, prediction of punishment can be inferred by dual  
356 alterations in the phase and the rate of the DA neurotransmission in the mPFC (model in Figure  
357 8h).

358 Our data showing preferential DA (vs non-DA) neuronal phase-locking with VTA and  
359 mPFC theta oscillations supports the theoretical model suggesting that the VTA DA input may  
360 play a crucial role for cortical theta oscillations (Buhusi and Meck, 2005). In addition, our data is  
361 consistent with previous studies showing that inhibiting DA D1 receptors in mPFC diminishes  
362 theta oscillations (Parker et al., 2014). While somewhat out of the scope of the present study, it  
363 is noteworthy that theta oscillations in the mPFC and/or VTA have been related to the  
364 hippocampal theta oscillation (Hyman et al., 2005; Jones and Wilson, 2005; Siapas et al., 2005;  
365 Sirota et al., 2008). Local infusion of DA in mPFC enhances theta oscillations and coherence  
366 between mPFC and hippocampus (Benchenane et al., 2010), while both mPFC and VTA



367 neurons exhibit phase coherence to the hippocampal theta oscillation (Fujisawa and Buzsaki,  
368 2011). Thus, the theta-mediated neural synchrony we observed in the VTA-mPFC circuit may  
369 be coupled with the hippocampal theta oscillation.

370         Recent studies have reported slow (4 Hz) oscillation in mPFC during fear-conditioned  
371 freezing in synchrony with other regions including the amygdala (Dejean et al., 2016; Karalis et  
372 al., 2016b; Likhtik et al., 2014). Considering the distinct behavioral states associated with 4 Hz  
373 oscillations in these studies and theta oscillations observed in our study, these findings together  
374 suggest that the mPFC may be entrained by distinct bands of oscillations in appetitive vs  
375 aversive states. However, the 4 Hz oscillation in the VTA-mPFC circuit has also been  
376 associated with working memory (Fujisawa and Buzsaki, 2011). The fast vs slow mPFC  
377 oscillations occurring in appetitive vs aversive states may arise in preferential synchrony with  
378 VTA or amygdala in appetitive vs aversive states, thereby the bottom-up information transfer  
379 from the two subcortical regions can be routed depending on the behavioral context. This  
380 scenario would predict that the theta-oscillation-mediated mesoprefrontal synchrony would  
381 diminish in the presence of punishment, whereas a 4 Hz oscillation may arise in the mPFC. In  
382 accord with this, our results showed that mPFC theta-oscillation-mediated synchrony  
383 significantly declined as a function of action-punishment contingency. We did not observe the  
384 emergence of 4 Hz oscillation presumably because, unlike fear conditioning paradigms, our task  
385 involved instrumental actions. Entrainment of a neural circuit with varying frequency oscillations  
386 as a function of a task variable has been widely observed in sensory cortical circuits (Bosman et  
387 al., 2012; Jia et al., 2013). Such frequency modulation, along with the power modulation, could  
388 promote selection and binding of task-relevant neuronal ensembles to give rise to a functional  
389 neural network (Fries, 2015). Likewise, our data may reflect the rise and fall of coherent VTA  
390 and mPFC neuronal ensembles that may promote a flexible control of instrumental behavior as  
391 a function of punishment contingency.

392           The neural synchrony mediated by different bands of oscillations in distinct behavioral  
393 states may also implicate neuron groups in the other mesocorticolimbic structures such as  
394 nucleus accumbens, amygdala, hippocampus, and lateral habenula that are critical for  
395 appetitive and aversive behaviors. Mounting evidence suggests that distinct VTA and mPFC  
396 neuron groups within the same region selectively respond to appetitive vs aversive events  
397 (Lammel et al., 2012; Ye et al., 2016). Importantly, these studies have shown that the neuron  
398 groups differentially tuned for appetitive vs aversive events display discrepant patterns of input-  
399 output connectivity within the mesocorticolimbic system (Howe and Dombeck, 2016; Lammel et  
400 al., 2012; Parker et al., 2016; Roeper, 2013; Ye et al., 2016). This projection specificity may be  
401 the foundation for the selective recruitment of distinct neuron groups in distinct-valence  
402 experiences. The anatomical connectivity alone, however, may not be sufficient to bind the  
403 neuron groups tuned to appetitive or aversive events into a functional neural network in a timely  
404 manner. Therefore, the neural synchrony mediated by coherent oscillations, such as that  
405 demonstrated here, may play a key role for the rise and fall of the functional neural networks  
406 depending on the behavioral context.

407           In conclusion, proper encoding of punishment and its contingency on an action is  
408 fundamental to adaptive behavior and survival. Our data reveal dynamic coding schemes of the  
409 VTA-mPFC neural circuit in representing risk of punishment and punishment-based modulation  
410 of rewarded actions.

411 **Experimental procedure**

412 **Subjects and surgical procedure**

413 Male Long Evans rats weighing 300~400 g (Harlan) were singly housed on a 12 h light/dark  
414 cycle (lights on at 7 p.m.). All data were collected during the dark cycle. Microelectrode arrays  
415 were surgically implanted in ipsilateral mPFC and VTA (N = 10) or bilateral mPFC (N = 4) of  
416 isoflurane-anesthetized rats (Figure 2a). All mPFC electrode arrays were placed in the prelimbic  
417 subregion of the mPFC. The following coordinates relative to the bregma were used: mPFC =  
418 AP +3.0 mm, ML 0.7 mm, DV 4.0 mm; VTA = AP -5.3 mm, ML 0.8 mm, DV 8.2 mm (Paxinos  
419 and Watson, 1998). Behavioral training began after 1 week of postsurgical recovery. At the  
420 completion of all recordings, rats were anesthetized with 400 mg/kg chloral hydrate and  
421 perfused with saline and 10 % buffered formalin. Coronal brain slices of mPFC and VTA were  
422 collected and cresyl-violet stained. Placements of electrode arrays were verified under a light  
423 microscope. All procedures were in accordance with the National Institute of Health's Guide to  
424 the Care and Use of Laboratory Animals, and were approved by the University of Pittsburgh  
425 Institutional Animal Care and Use Committee.

426

427 **An instrumental task with varying punishment-action contingency**

428 After the postsurgical recovery, rats were kept at 85 % of their free-feeding weight on a  
429 restricted diet of 13 g food pellets a day with free access to water. In an operant chamber, rats  
430 were fully trained to make an instrumental nose poke to the cue port to receive a sugar pellet at  
431 the food trough located in the opposite side of the chamber on the fixed ratio schedule of one –  
432 i.e., FR1 (Figure 1a-b). After completion of three FR1 sessions consisting of 150 trials in 60  
433 mins, rats were trained with the task consisting of three blocks with varying degrees of action-  
434 punishment contingency (50 trials per block). Each block was assigned an action-punishment  
435 contingency of 0, 0.06, or 0.1 – i.e., the conditional probability of receiving an electrical foot  
436 shock (0.3 mA, 300 ms) given an action. The action–reward contingency was kept at 1 across

437 all training and recording sessions; i.e., every nose poke procured a reward even in the shock  
438 trials. To minimize generalization of the action-punishment contingency across blocks, they  
439 were organized in an ascending shock probability order – Block1: 0, Block2: 0.06, Block3: 0.1,  
440 interleaved with 2-min timeout between blocks. In block 2 and 3 of each session, 3 and 5 trials  
441 were pseudo-randomly selected and followed by an electrical foot shock. No explicit cue was  
442 provided on shock trials to keep the shock occurrence unpredictable. The cue onset only  
443 signaled initiation of a trial. Animals were informed of the block shift by the 2-min darkened  
444 timeout in between blocks. In addition, the first shock trial of block 2 and the first two shock trials  
445 of block 3 were randomly selected from the initial 5 trials of each block. Also, animals completed  
446 two sessions of this task before the recording session, thus the shock occurrence and the task  
447 design including the ascending punishment contingency were not novel to them at the time of  
448 the recording session. All training and recording sessions were terminated if not completed in  
449 180 mins, and data from the completed sessions only were analyzed. Animals displayed stable  
450 behavioral performance overall without any sign of contextual fear conditioning, since they  
451 performed fearless in the safe block across all sessions. In addition, there was no evidence for  
452 habituation to the shock as they showed equivalent punishment-based behavioral changes  
453 across sessions. For the diazepam pretreatment experiment, a separate group of rats (N = 9)  
454 were trained using abovementioned procedure, and they underwent three test sessions with  
455 intraperitoneal pretreatment of saline – diazepam (2 mg/kg, Hospira, Inc.) – saline. Injected  
456 animals were returned to their home cage for 10 minutes before they were placed in the operant  
457 chamber. Three days of washout period was allowed between sessions.

458

### 459 **Electrophysiology**

460 Single-unit activity and local field potentials (LFPs) were recorded simultaneously using a pair of  
461 eight channel Teflon-insulated stainless steel 50  $\mu$ m microwire arrays (NB Laboratories). Unity-  
462 gain junction field effect transistor headstages were attached to a headstage cable and a

463 motorized commutator nonrestrictive to the animals' movement. Signals were amplified via a  
464 multichannel amplifier (Plexon). Spikes were bandpass filtered between 220 Hz and 6 kHz,  
465 amplified  $\times 500$ , and digitized at 40 kHz. Single-unit activity was then digitally high-pass filtered  
466 at 300 Hz and LFP were low-pass filtered at 125 Hz. Continuous single-unit and LFP signals  
467 were stored for offline analysis. Single units were sorted using the Offline Sorter software  
468 (Plexon). Only the single-units with a stable waveform throughout the recording session were  
469 further analyzed. If a unit presented a peak of activity at the time of the reference unit's firing in  
470 the cross-correlogram, only either of the two was further analyzed.

471

## 472 **Neural data analysis**

473 Single unit and LFP data analyses were conducted with Matlab (MathWorks) and SPSS  
474 statistical software (IBM). For single unit data analyses, 1-ms binned spike count matrix of the  
475 peri-cue, action, and reward periods (starting 2 s before each event and ending 2 s after each  
476 event) were produced per unit. The baseline period was a 2-s time window beginning 2.5 s  
477 before the cue onset. For all neural data analyses, the trials with shock delivery (three and five  
478 trials for block 2 and 3, respectively) were excluded as single-unit and LFP signals in these trials  
479 were affected by electrical artifacts during shock delivery.

480 *Trial-averaged firing-rate analysis.* Spike count matrices were further binned using a 200 ms  
481 rectangular moving window with steps of 50 ms within the -2 to 2 s epoch aligned to the task  
482 event occurring at time = 0 for the firing rate analysis. Binned spike counts were transformed to  
483 firing rates and averaged across trials. The trial-averaged firing rate of each unit was Z-score  
484 normalized using the mean and standard deviation of its baseline firing rate.

485 *VTA cell classification.* The VTA single units were classified into putative dopamine (DA) or non-  
486 dopamine (non-DA) neurons based on two criteria. First, units whose mean baseline firing rate  
487 slower than 12 Hz, waveform width greater than 1.2 ms were considered as potential DA units  
488 (Grace and Bunney, 1984; Kim et al., 2015; Schultz and Romo, 1987). This traditional

489 classification, however, has been suggested to be potentially inaccurate (Margolis et al., 2006).  
490 Thus, the second criterion utilized the neuronal reward response properties for the putative DA  
491 and non-DA cell identification. Receiver-operating characteristic (ROC) curves were calculated  
492 by comparing the distribution of firing rates across trials in 100 ms bins (starting 0.5 s before  
493 reward delivery and ending 1 s after reward delivery) to the distribution of baseline firing rates.  
494 Principal component analysis was conducted using the singular value decomposition of the area  
495 under the ROC (auROC). Units were mapped in the 3-d space comprising the top three  
496 principal components. Within the 3-d PC space, unsupervised clustering was conducted by  
497 fitting Gaussian mixture models using the expectation-maximization algorithm. This method  
498 found two clusters: one with phasic excitation to reward (Type 1), one with sustained excitation  
499 or suppression to reward (Type 2) (Figure S1c-e). Units in the former class were classified as  
500 putative DA units, as previous studies have shown that optogenetically tagged dopamine  
501 neurons displayed similar phasic excitatory reward responses (Cohen et al., 2012; Eshel et al.,  
502 2015). Taken together, we defined a VTA unit satisfying both criteria as a putative DA unit and a  
503 unit that met either or none of the criteria as a putative non-DA unit (Figure S1). mPFC units  
504 were not classified based on their firing and spike-waveform properties. Only 2 out of the total  
505 293 mPFC single units had the mean baseline firing rates higher than 20 Hz, thus few fast-  
506 spiking interneurons should be included in our data analysis.

507 *Spike rate selectivity.* To quantify single neuronal encoding of blockwise action-punishment  
508 contingency, we computed a bias-corrected percent explained variance ( $\omega$ PEV) statistic with  
509 binned spike counts calculated in a 200 ms rectangular window moving with steps of 50 ms  
510 within the 2-s peri-event epochs (-1 to 1 s with an event occurring at time = 0).

$$511 \quad \omega_{\text{PEV}} = \frac{SS_{\text{Blocks}} - df_{\text{Blocks}}MS_{\text{Error}}}{SS_{\text{Total}} + MS_{\text{Error}}}$$

512 where  $SS_{\text{Blocks}}$  and  $SS_{\text{Total}}$  are the between-blocks (action-punishment contingency) and total sums  
513 of squares,  $df_{\text{Blocks}}$  is degrees of freedom, and  $MS_{\text{Error}}$  is the mean squared error. This formulation

514 resulted in an unbiased metric with an expected value of zero when there is no difference  
515 across blocks (Buschman et al., 2012; Keren, 1979). A unit was determined to encode action-  
516 punishment contingency if its peri-event  $\omega$ PEV surpassed ‘the global  $\omega$ PEV band’, which was  
517 defined as the upper bound of the 99 % confidence interval of the trial-shuffled (1,000 times)  
518 surrogate  $\omega$ PEV distribution – i.e., fewer than 1 % of the trial-shuffled  $\omega$ PEVs crossed the global  
519 band across all time bins in the peri-event epoch ( $\alpha = 0.01$ ). To find the global  $\omega$ PEV band, we  
520 computed the mean and standard deviation of the trial-shuffled  $\omega$ PEV distribution. By stepping  
521 up from the mean by one-hundredth of the standard deviation, we found the pointwise band at  
522 each time bin and the global band across time bins both at  $\alpha = 0.01$  (Figure S2). This approach  
523 effectively resolves the issue of multiple comparisons that can arise as statistical comparisons  
524 made separately across multiple time bins increase the rate of false rejection of the null  
525 hypothesis (Fujisawa et al., 2008). We repeated this analysis using the mutual information  
526 metric, and found that the two metrics yielded similar results.

527 *Linear regression analysis.* For a standardized quantification of the individual neuronal encoding  
528 of action-punishment contingency in peri-event epochs, we computed the standardized  
529 regression coefficient of the following linear regression model for each unit:

$$530 \quad SC = \beta_{\text{punishment contingency}} X + \varepsilon$$

531 where SC denotes binned spike counts calculated in a 200 ms moving window with steps of 50  
532 ms,  $\beta_{\text{punishment contingency}}$  regression coefficients for the independent variable, blockwise  
533 punishment contingency (1, shock prob. = 0; 2, shock prob. = 0.06; 3, shock prob. = 0.1),  
534 respectively. The regression coefficients were standardized by  $\beta \times (S_x / S_y)$ , where  $S_x, S_y$  denote  
535 the standard deviations of independent and dependent variables, respectively.

536 *LFP power spectra and coherence.* The local field potential (LFP) power spectral densities were  
537 quantified using the chronux routine mtspecgramc (Bokil et al., 2010). Briefly, the LFP time

538 series within the peri-event epochs were Fourier transformed in a 500 ms moving window with  
539 steps of 50 ms with the multi-taper method applied:

$$540 \quad S = \frac{1}{K} \sum_{k=1}^K \left| \int_0^T u_k(t) x(t) e^{-2\pi i f t} dt \right|^2$$

541 where  $u_k(t)$  is the multi-tapers (9 tapers were used),  $x(t)$  is the LFP time series in a moving  
542 window. The baseline normalized power spectra (Z-score) were calculated using the mean and  
543 standard deviation of the baseline power spectra across trials. In addition, we inspected the  
544 trial-by-trial spectro-temporal representations of LFP time series applying the continuous  
545 wavelet transform. We confirmed that comparable representations were attained by the Fourier-  
546 and wavelet-based time-frequency analyses.

547 The magnitude squared coherence (MSC) between time series recorded from mPFC  
548 and VTA was calculated in the same moving window with the 9 multi-tapers applied using the  
549 chronux routine cohgramc. Briefly, the MSC was quantified as:

$$550 \quad C_{xy}(f) = \frac{|S_{xy}(f)|^2}{S_x(f)S_y(f)}$$

551 where  $S_{xy}(f)$  is the cross spectral density of LFP time series in the two regions, and  
552  $S_x(f)$ ,  $S_y(f)$  are the autospectral density for each region.

553 *Bivariate Granger causality analysis.* To examine mutual influences (directionality) between LFP  
554 oscillations in the two regions, we quantified Granger causality between the simultaneously  
555 recorded peri-action LFP traces (-2 to 2 s around the action occurring at time = 0). The bivariate  
556 Granger causality (G-causality) infers causality between two time series data based on temporal  
557 precedence and predictability (Barnett and Seth, 2014; Granger, 1969). That is, a variable  $X_1$   
558 ‘Granger causes’ a variable  $X_2$  if information in the past of  $X_1$  helps predict the future of  $X_2$  with  
559 better accuracy than is possible when considering only information already in the past of  $X_2$



560 itself. In this framework, two time series  $X_1(t)$  and  $X_2(t)$  recorded from mPFC and VTA can be  
 561 described by a bivariate autoregressive model:

$$562 \quad X_1(t) = \sum_{j=1}^p A_{11,j} X_1(t-j) + \sum_{j=1}^p A_{12,j} X_2(t-j) + \varepsilon_1(t)$$

$$563 \quad X_2(t) = \sum_{j=1}^p A_{21,j} X_1(t-j) + \sum_{j=1}^p A_{22,j} X_2(t-j) + \varepsilon_2(t)$$

564 where  $p$  is the model order (the maximum number of time-lagged observations included in the  
 565 model), which was estimated by the Akaike information criterion. We then estimated parameters  
 566 of the model;  $A$  contains the coefficients of the model, and  $\varepsilon_1, \varepsilon_2$  are residuals (prediction errors)  
 567 with covariance matrix  $\Sigma$  for each time series.

568 Once the model coefficients  $A_j$  and  $\Sigma$  are estimated, the spectral matrix can be obtained  
 569 as:

$$570 \quad S(f) = \langle X(f)X^*(f) \rangle = H(f)\Sigma H^*(f)$$

571 where the asterisk denotes matrix transposition and complex conjugation,  $\Sigma$  is the noise  
 572 covariance matrix, and the transfer function  $H(f)$  is defined as the inverse matrix of the Fourier  
 573 transform of the regression coefficients:

$$574 \quad H(f) = \left( I - \sum_{j=1}^p A_j e^{-2\pi i k f} \right)^{-1} \quad 0 \leq f \leq 2\pi$$

575 The spectral G-causality from 1 to 2 is then obtained by:

$$576 \quad I_{1 \rightarrow 2}(f) = -\ln \left( 1 - \frac{(\Sigma_{11} - \Sigma_{21}^2 / \Sigma_{22}) |H_{21}(f)|^2}{S_{22}(f)} \right)$$

577 The spectral G-causality measure lacks known statistical distribution, thus a random  
 578 permutation method was used to generate a surrogate distribution, by which the upper bound of  
 579 the confidence interval was found at  $\alpha = 0.001$ . This procedure was implemented using an

580 open-source matlab toolbox, the Multivariate Granger Causality Toolbox (Barnett and Seth,  
581 2014).  
582 *LFP-Spike phase-locking analysis.* To quantify the individual neuronal spike time synchrony with  
583 the local and interregional theta oscillations were quantified as follows. The mPFC and VTA  
584 LFPs during the baseline and peri-action 4-s time windows were bandpass filtered to isolate  
585 oscillations within 5 – 15 Hz frequency range. The instantaneous phase of each filtered LFP  
586 segment was determined using the Hilbert transform and each spike was assigned the phase of  
587 its contemporaneous LFP segment. The phase-locking value (PLV) of each unit was defined as  
588 the circular concentration of the resulting phase angle distribution, which was quantified as the  
589 mean resultant length (MRL) of the phase angles. The MRL is the modulus of the sum of unit  
590 vectors indicating instantaneous phases of each spike occurrence normalized by the number of  
591 spikes, thus the MRLs were bound to take a value between 0 (no phase-locking) to 1 (perfect  
592 phase-locking).

593

$$MRL = \frac{1}{N} \left| \sum_{n=1}^N e^{j\Phi_n} \right|$$

594 where  $\Phi_n$  represents the phase assigned to  $n^{\text{th}}$  spike occurrence, and  $N$  is the total number of  
595 spikes. Since the MRL statistic is sensitive to the number of spikes, we calculated MRL 1,000  
596 times with 100 spikes of each unit randomly selected for each iteration, and the PLV was the  
597 MRL averaged across all iterations. As comparing PLVs across blocks with varying action-  
598 punishment contingency was of our central interest, PLV was computed per each block. Only  
599 the units with their peri-action spike counts within each block greater than 100 in all three blocks  
600 were included in the phase-locking analysis. Units passing the Rayleigh's z-test at  $\alpha = 0.05$   
601 were determined to be significantly phase-locked. The directionality of the LFP and spike phase  
602 relationship was inferred by a time-lagged phase-locking analysis, in which the spike times were  
603 shifted relative to the LFP time series, stepping by 4 ms within the range of -100 to 100 ms

604 (Likhnik et al., 2014; Spellman et al., 2015). At each time lag, the PLV of each single unit and its  
605 significance were assessed, and the maximum PLV across all time lags was found for each unit.  
606 We repeated the analysis with different time lags and analysis windows, and confirmed that the  
607 results were very similar across different parameters.

608

### 609 **Statistical analysis**

610 Parametric statistical tests were used for z-score normalized data and non-normalized data that  
611 are conventionally tested using a parametric test. Nonparametric approaches, such as  
612 conventional nonparametric tests or bootstrapping were used for a hypothesis test of data, of  
613 which statistical distribution is unknown, e.g. phase-locking values (PLVs). For all tests, the  
614 Greenhouse–Geisser correction was applied as necessary due to violations of sphericity. All  
615 statistical tests were specified as two-sided. Multiple testing correction was applied for all tests  
616 including multiple comparisons using the Bonferroni correction.

## 617 Figure legends

618 **Figure 1.** Punishment induces anxiety-like changes in reward-seeking behavior. (a) A  
619 schematic diagram illustrating the task. (b) Representative behavioral trajectories in block 1 (left,  
620 10 trials) and block 3 (right, 10 trials). (c) Significant increases in RT (filled bars) and immobile  
621 RT (slashed bars) were observed as a function of punishment contingency. (Inset) Latency from  
622 reward delivery to retrieval (reward RT) did not differ across blocks. (d) RT, immobile RT, and  
623 reward RT did not change across blocks in the absence of punishment. (e) Animals performed  
624 three sessions of the task with pretreatment of saline (Day 1) – diazepam (2 mg/kg) – saline  
625 (Day 2). Pretreatment of an anxiolytic diazepam (2 mg/kg) but not saline injection averted  
626 punishment-induced increase in the mean RT.  $**p < 0.005$ ; post hoc test. (Inset) Injections did  
627 not influence reward RT.

628 **Figure 2.** mPFC, VTA DA, and non-DA single units respond to task events and punishment. (a)  
629 Peri-event activity averaged across all trials and all units within each neuron group. Dual-  
630 colored bars above indicate significant pairwise differences at corresponding time bins  
631 according to the post hoc analysis ( $p < 0.05$ ). The green shadows indicate time windows of  
632 statistical analyses. (b) Baseline-normalized peri-event firing rates of mPFC units are plotted per  
633 block to reveal neuronal responses to punishment. Only units with significant activity modulation  
634 are plotted – i.e., punishment-encoding units (Figure S3). (c) Peri-event activity of VTA putative  
635 DA (top panels) and non-DA (bottom panels) punishment-encoding units. (d-e) Identification of  
636 single units discriminating their firing rates across different blocks as a function of punishment.  
637 (d) Left, A raster plot showing a representative mPFC unit's peri-action spike activity across  
638 blocks with spike density functions of different blocks superimposed. Right, To quantify each  
639 unit's encoding, percent variance in the unit's firing rate explained by blockwise change in  
640 punishment contingency ( $\omega$ PEV) was calculated. To determine the global  $\omega$ PEV band, trial-  
641 shuffled surrogate  $\omega$ PEV distribution (light blue curves) was acquired, and the pointwise and  
642 global  $\omega$ PEV bands were found from the distribution at  $\alpha = 0.01$  (Experimental procedure). A  
643 unit whose  $\omega$ PEV curve crosses the global band was determined as a punishment-encoding  
644 unit. (e) Left, A representative VTA unit's peri-action activity across blocks. Right, This VTA unit  
645 satisfied the punishment-encoding criterion.

646  
647 **Figure 3.** mPFC, VTA DA, and non-DA single units encode action-punishment contingency by  
648 modulating their peri-event and baseline firing rates. (a) Shaded area indicates the mean  $\pm$   
649 s.e.m.  $\omega$ PEV averaged across all units in each neuron group (left vertical axis) across time. Line  
650 plots indicating proportions of punishment-encoding units are superimposed (right vertical axis).  
651 (b) To reveal time points of punishment encoding, crossing of the global  $\omega$ PEV band by each  
652 unit is marked with a line segment (Experimental procedure). Only the units with at least one  
653 crossing are included in each plot. Single units with significant change in their baseline firing  
654 rate are marked with gray lines (see below). (c) Subpopulations of single units represented  
655 punishment with significant excitatory or inhibitory modulation of their baseline (inter-trial  
656 interval) activity. The mean  $\pm$  s.e.m. baseline firing rates are plotted across trials and blocks.

657 **Figure 4.** Distinct subpopulations of single units encode action-punishment contingency with  
658 excitatory or inhibitory activity modulation. (a, c, e) Units are distributed across the horizontal  
659 axis based on modulation of their peri-action activity across blocks as a function of punishment.  
660 Standardized regression coefficients (SRC) were computed for a normalized quantification of  
661 each unit's peri-action activity modulation by punishment (Experimental procedure). In each  
662 distribution, units with excitatory or inhibitory activity modulation are located in the right or left  
663 portion of the distribution, respectively. Punishment-encoding units are solid-colored, while non-  
664 encoding units are pale-colored. (a) Direction of the mPFC neuronal activity modulation. (b) The  
665 baseline-normalized activity of the mPFC encoding units per block (mean  $\pm$  s.e.m.). (c) Direction  
666 of the VTA DA neuronal activity modulation. (d) The activity of the VTA DA encoding units per  
667 block (mean  $\pm$  s.e.m.). Asterisk indicates a significant effect of block on the peri-action activity ( $p$   
668  $< 0.05$ ). (e) Direction of the VTA non-DA neuronal activity modulation. (f) The activity of the  
669 VTA non-DA encoding units per block (mean  $\pm$  s.e.m.).

670  
671 **Figure 5.** Blockwise firing rate changes in the presence vs absence of punishment contingency.  
672 (a) Proportion of mPFC units showing significant firing-rate changes across blocks during the  
673 peri-action epoch in the presence vs absence (no-shock control) of punishment. (b) Left,  
674 Percent variance in the mPFC unit firing rates explained by the block shift ( $\omega$ PEV) in the  
675 presence vs absence of punishment (mean  $\pm$  s.e.m.). Right, Maximum peri-action  $\omega$ PEV of  
676 mPFC units differed in the presence vs absence of punishment (Student's t-test,  $t_{291} = 3.81$ ,  $p <$   
677  $0.001$ ). (c) Proportion of VTA DA units showing significant firing-rate changes across blocks. (d)  
678 Left,  $\omega$ PEV of VTA DA units. Right, Maximum peri-action  $\omega$ PEV of VTA DA units ( $t_{81} = 4.19$ ,  $p <$   
679  $0.001$ ). (e) Proportion of VTA non-DA units showing significant firing-rate changes across  
680 blocks. (f) Left,  $\omega$ PEV of VTA non-DA units. Right, Maximum peri-action  $\omega$ PEV of VTA non-DA  
681 units ( $t_{74} = 2.25$ ,  $p = 0.028$ ). \* $p < 0.05$ , \*\* $p < 0.005$ .

682  
683 **Figure 6.** Punishment diminishes theta oscillation-mediated neural synchrony in the VTA-mPFC  
684 circuit. (a) Representative VTA peri-event LFP traces in a block 1 trial. Bandpass filtered LFP  
685 signal (heavy line) is superimposed on the raw trace (thin line). (b) Simultaneously recorded  
686 mPFC LFP traces. (c) Baseline-normalized VTA power spectrograms averaged across block 1  
687 trials (left: peri-cue, right: pre-action). mPFC block 1 power spectrograms are in (d). (e)  
688 Diminished VTA theta power in block 3. (f) Similar diminishment observed in mPFC theta power.  
689 (g) Mean  $\pm$  s.e.m. (shaded area) normalized VTA PSDs per block corresponding to 1-s post-cue  
690 (left) and pre-action (right) epochs. Dual-colored bars below indicate significant pairwise  
691 differences at corresponding frequency bins according to post hoc analyses ( $p < 0.05$ ). (h)  
692 Normalized mPFC PSDs in post-cue (left) and pre-action (right) epochs. (i) Normalized VTA-  
693 mPFC LFP coherence in post-cue (left) and pre-action (right) epochs. Insets represent non-  
694 normalized LFP coherences of each block. (j) Granger-causality, representing mutual influences  
695 (directionality) between VTA and mPFC peri-action LFP time series in block 1 (left) and block 3  
696 (right). Blue and orange curves represent mPFC-to-VTA and VTA-to-mPFC Granger-causal  
697 influences, respectively. Shaded areas indicate s.e.m. Thin colored-lines below indicate upper  
698 bounds of confidence intervals ( $\alpha = 0.001$ ) acquired by the random permutation resampling of  
699 time bins. Asterisk indicates significant difference between bidirectional Granger-causal  
700 influences at the corresponding frequency bin ( $p < 0.05$ ).

701 **Figure 7.** Contingency of punishment reduces VTA and mPFC neuronal synchrony to local  
702 theta oscillation. (a-c) Modulation of mPFC neuronal synchrony to mPFC theta oscillation.  
703 Phase-locking values (PLVs) were quantified by averaging 1,000 mean resultant lengths  
704 (MRLs) of the circular phase angle distribution comprising 100 resampled spikes per iteration  
705 (Experimental procedure). (a) Fold change from baseline in the strength of the neuronal phase-  
706 locking during peri-action epoch in units that passed Rayleigh z-test (Sig.) and rest of the units  
707 (N.S.). (b) Top, Normalized PLVs in block 1 across a range of time lags for all phase-locked  
708 mPFC units, aligned by peak lags. Bottom, Percentage of significantly phase-locked mPFC  
709 units in block 1 vs 3 across a range of lags. (c) Mean  $\pm$  s.e.m. PLVs across different blocks.  
710 Inset, PLVs including significantly phase-locked units only. (d-h) Modulation of VTA neuronal  
711 synchrony to VTA theta oscillation. (d) Fold change from baseline in the strength of the neuronal  
712 phase-locking. (e) Top, Normalized PLVs in block 1 of all phase-locked VTA units. Bottom,  
713 Percentage of significantly phase-locked VTA units. (f) Mean  $\pm$  s.e.m. PLVs across different  
714 blocks. (g) Percentage of phase-locked VTA DA and non-DA units. (h) PLVs of VTA DA and  
715 non-DA units plotted separately.

716  
717 **Figure 8.** Contingency of punishment reduces mPFC neuronal synchrony to the VTA theta  
718 oscillation. (a) Top, Example raw (thin line) and bandpass filtered (heavy line) VTA LFP traces.  
719 Bottom, Neuronal spikes of a simultaneously recorded mPFC single unit. This unit's preferred  
720 phase is indicated with light blue columns superimposed on the LFP trace. (b) Distribution of  
721 spike phase angles of the example mPFC unit relative to the VTA theta oscillation (Rayleigh's  $p$   
722  $< 0.001$ ). (c) Fold change from baseline in the strength of mPFC neuronal phase-locking (PLV)  
723 during the peri-action epoch in units that passed Rayleigh z-test (Sig.) and rest of the units  
724 (N.S.). (d) Top, Normalized PLVs in block 1 across a range of time lags for all phase-locked  
725 mPFC units, aligned by peak lags. Bottom, Percentage of significantly phase-locked units in  
726 block 1 vs 3 (e) Left, PLVs calculated with negative and positive time lags applied to spike trains  
727 relative to LFP time series. Right, Mean  $\pm$  s.e.m. PLVs of all units across different blocks. Inset,  
728 PLVs including significantly phase-locked units only. (f-g) Polar plots represent the distribution  
729 of spike-phase angles of an example mPFC unit in block 1 vs 3. To quantify the circular  
730 concentration of phase angles, we calculated the mean resultant vector indicated as a  
731 superimposed bar on each polar plot. (h) At the neural circuit level, the theta-oscillation-  
732 mediated neural synchrony in the VTA-mPFC circuit that emerged during punishment-free  
733 actions declined during punishment-prone actions. Neural synchrony mediated by the theta  
734 oscillation may subserve binding of the VTA-mPFC neurons responding to the appetitive action  
735 into the "appetitive" neural network. Our observation of decline in theta-mediated neural  
736 synchrony may reflect reduced activation of the appetitive neural network in the presence of  
737 punishment contingency.

738  
739 **Supplementary Figure 1.** Histologically verified placements of mPFC and VTA electrodes. We  
740 recorded activity of ipsilateral VTA and mPFC (N=10) or bilateral mPFC (N=4). Coordinates are  
741 relative to the bregma.

742  
743 **Supplementary Figure 2.** Classification of VTA single units to putative DA or putative non-DA  
744 units. (a) Representative spike waveforms of a putative DA (top) and a non-DA (bottom) units.

745 (b) Units were first classified based on their mean baseline firing rate and width of the spike  
746 waveform. Units whose mean baseline firing rate slower than 12 Hz, waveform width greater  
747 than 1.2 ms were considered to be putative DA units (blue circles). (c) To characterize each  
748 unit's reward response, ROC curves were calculated by comparing the firing-rate distributions of  
749 reward delivery vs baseline epochs. (d) Principal component analysis (PCA) was conducted on  
750 auROC values. (e) Units were mapped onto a 3-d space comprising the top three principal  
751 components. Unsupervised clustering was conducted by fitting Gaussian mixture models which  
752 yielded two clusters of units: one with phasic excitation to reward (blue circles), the other with  
753 sustained excitation or suppression to reward (red circles). Units in the former cluster were  
754 classified as putative DA units. Only the units satisfying both criteria (b) and (e) were finally  
755 labelled as putative DA units, and the rest of units were putative non-DA units.

756

757 **Supplementary Figure 3.** Representative punishment-encoding mPFC (a-b), VTA DA (c-d),  
758 and non-DA (e-f) single units. In each plot, data are for 150 trials of action with three different  
759 levels of punishment contingency. Each row represents each trial. Ticks mark spike times. The  
760 horizontal axis represents time around the action occurring at time = 0. Spike density functions  
761 of different blocks are superimposed as mean  $\pm$  s.e.m. (shaded area).

762

763 **Supplementary Figure 4.** mPFC and VTA theta oscillations did not change across blocks in the  
764 absence of punishment. (a) Mean  $\pm$  s.e.m. (shaded area) normalized VTA PSDs of each block  
765 corresponding to 1 s pre-action epoch. Dual-colored bars below indicate significant pairwise  
766 differences at corresponding frequency bins according to post hoc analyses ( $p < 0.05$ ). (b)  
767 Normalized mPFC PSDs. (c) Normalized VTA-mPFC LFP coherence of each block in the pre-  
768 action epoch. Insets represent non-normalized LFP coherences. (d) Granger-causality,  
769 representing mutual influences (directionality) between VTA and mPFC peri-action LFP time  
770 series in block 1 (left) & 3 (right). Blue and orange curves represent mPFC-to-VTA and VTA-to-  
771 mPFC Granger-causal influences, respectively. Shaded areas indicate s.e.m. Thin colored-lines  
772 below indicate upper bounds of confidence intervals ( $\alpha = 0.001$ ) acquired by the random  
773 permutation resampling of time bins. An asterisk indicates significant difference between  
774 bidirectional Granger-causal influences at the corresponding frequency bin ( $p < 0.05$ ).

775

776 **Supplementary Figure 5.** VTA single units show weak phase synchrony to the mPFC theta  
777 oscillation. (a) Fold change from baseline in the strength of the neuronal phase-locking. (b) Top,  
778 Normalized PLVs in block 1 for all phase-locked VTA units. The phase-locked units displayed  
779 their peak PLVs with negative or positive time lags, indicating weak phase modulation of VTA  
780 spike activity by the mPFC theta oscillation (Signed-rank test,  $p = 0.129$ ). Bottom, Percentage of  
781 significantly phase-locked VTA units did not differ across blocks. (c) Mean  $\pm$  s.e.m. PLVs across  
782 different blocks. No significant change was found across blocks (Signed-rank test,  $p$  values  $>$   
783  $0.33$ ). (d) Percentage of phase-locked VTA DA vs non-DA units. (e) PLVs of VTA DA and non-  
784 DA units plotted separately. PLVs did not differ across blocks in both VTA cell types (Signed-  
785 rank test,  $p$  values  $> 0.25$ ).

786

787 **Supplementary Figure 6.** mPFC neuronal synchrony to mPFC and VTA theta oscillations did  
788 not change across blocks in the absence of punishment (No-shock control). (a-c) mPFC

789 neuronal phase-locking to mPFC theta oscillation. (a) Fold change from baseline in the strength  
790 of the neuronal phase-locking during peri-action epoch in units that passed Rayleigh z-test  
791 (Sig.) and rest of the units (N.S.). (b) Top, Normalized PLVs in block 1 across a range of time  
792 lags for all phase-locked mPFC units, aligned by peak lags. Bottom, Percentage of significantly  
793 phase-locked mPFC units in block 1 vs 3 across a range of lags. (c) Mean  $\pm$  s.e.m. PLVs across  
794 different blocks. Inset, PLVs including significantly phase-locked units only. The PLVs did not  
795 significantly differ across blocks (Signed-rank test,  $p$  values  $> 0.105$ ). (d-f) mPFC neuronal  
796 phase-locking to the VTA theta oscillation. The PLVs did not significantly differ across blocks  
797 (Signed-rank test,  $p$  values  $> 0.392$ ).

798

799 **Supplementary Figure 7.** VTA neuronal synchrony to VTA and mPFC theta oscillations did not  
800 change across blocks in the absence of punishment (No-shock control). (a-e) VTA neuronal  
801 phase-locking to the VTA theta oscillation. (a) Fold change from baseline in the strength of the  
802 neuronal phase-locking during peri-action epoch in units that passed Rayleigh z-test (Sig.) and  
803 rest of the units (N.S.). (b) Top, Normalized PLVs in block 1 across a range of time lags for all  
804 phase-locked VTA units, aligned by s. Bottom, Percentage of significantly phase-locked VTA  
805 units in block 1 vs 3 across a range of lags. (c) Mean  $\pm$  s.e.m. PLVs across different blocks. The  
806 PLVs did not significantly differ across blocks (Signed-rank test,  $p$  values  $> 0.743$ ). Inset, PLVs  
807 including significantly phase-locked units only. (d) Percentage of phase-locked VTA DA vs non-  
808 DA units. Greater fraction of DA units (50 %) appeared to be phase-locked to the VTA theta  
809 oscillation compared with non-DA units (18 %) (Chi-square test,  $\chi^2_1 = 6.959$ ,  $p = 0.008$ ). (e)  
810 PLVs of VTA DA and non-DA units plotted separately. (f-j) VTA neuronal phase-locking to the  
811 mPFC theta oscillation. (h) The VTA neuronal phase-locking to the mPFC theta oscillation did  
812 not differ across blocks (Signed-rank test,  $p$  values  $> 0.355$ ). Conventions are same as above.



813 **Author contributions**

814 J.P. and B.M. designed research; J.P. performed experiments and analyzed data; J.P. and B.M.  
815 wrote the paper.

## 816 References

- 817 Abercrombie, E.D., Keefe, K.A., DiFrischia, D.S., and Zigmond, M.J. (1989). Differential effect of stress on  
818 in vivo dopamine release in striatum, nucleus accumbens, and medial frontal cortex. *Journal of*  
819 *neurochemistry* 52, 1655-1658.
- 820 Adhikari, A., Topiwala, M.A., and Gordon, J.A. (2010). Synchronized activity between the ventral  
821 hippocampus and the medial prefrontal cortex during anxiety. *Neuron* 65, 257-269.
- 822 Barnett, L., and Seth, A.K. (2014). The MVGC multivariate Granger causality toolbox: a new approach to  
823 Granger-causal inference. *J Neurosci Methods* 223, 50-68.
- 824 Barraclough, D.J., Conroy, M.L., and Lee, D. (2004). Prefrontal cortex and decision making in a mixed-  
825 strategy game. *Nat Neurosci* 7, 404-410.
- 826 Bechara, A., Tranel, D., and Damasio, H. (2000). Characterization of the decision-making deficit of  
827 patients with ventromedial prefrontal cortex lesions. *Brain* 123 ( Pt 11), 2189-2202.
- 828 Benchenane, K., Peyrache, A., Khamassi, M., Tierney, P.L., Gioanni, Y., Battaglia, F.P., and Wiener, S.I.  
829 (2010). Coherent theta oscillations and reorganization of spike timing in the hippocampal- prefrontal  
830 network upon learning. *Neuron* 66, 921-936.
- 831 Berger, B., Thierry, A.M., Tassin, J.P., and Moyne, M.A. (1976). Dopaminergic innervation of the rat  
832 prefrontal cortex: a fluorescence histochemical study. *Brain Res* 106, 133-145.
- 833 Bokil, H., Andrews, P., Kulkarni, J.E., Mehta, S., and Mitra, P.P. (2010). Chronux: a platform for analyzing  
834 neural signals. *J Neurosci Methods* 192, 146-151.
- 835 Bosman, C.A., Schoffelen, J.M., Brunet, N., Oostenveld, R., Bastos, A.M., Womelsdorf, T., Rubehn, B.,  
836 Stieglitz, T., De Weerd, P., and Fries, P. (2012). Attentional stimulus selection through selective  
837 synchronization between monkey visual areas. *Neuron* 75, 875-888.
- 838 Bradberry, C.W., Gruen, R.J., Berridge, C.W., and Roth, R.H. (1991). Individual differences in behavioral  
839 measures: correlations with nucleus accumbens dopamine measured by microdialysis. *Pharmacol*  
840 *Biochem Behav* 39, 877-882.
- 841 Brischoux, F., Chakraborty, S., Brierley, D.I., and Ungless, M.A. (2009). Phasic excitation of dopamine  
842 neurons in ventral VTA by noxious stimuli. *Proc Natl Acad Sci U S A* 106, 4894-4899.
- 843 Bromberg-Martin, E.S., Matsumoto, M., and Hikosaka, O. (2010). Dopamine in motivational control:  
844 rewarding, aversive, and alerting. *Neuron* 68, 815-834.
- 845 Buhusi, C.V., and Meck, W.H. (2005). What makes us tick? Functional and neural mechanisms of interval  
846 timing. *Nat Rev Neurosci* 6, 755-765.
- 847 Buschman, T.J., Denovellis, E.L., Diogo, C., Bullock, D., and Miller, E.K. (2012). Synchronous oscillatory  
848 neural ensembles for rules in the prefrontal cortex. *Neuron* 76, 838-846.
- 849 Carr, D.B., and Sesack, S.R. (2000a). GABA-containing neurons in the rat ventral tegmental area project  
850 to the prefrontal cortex. *Synapse* 38, 114-123.
- 851 Carr, D.B., and Sesack, S.R. (2000b). Projections from the rat prefrontal cortex to the ventral tegmental  
852 area: target specificity in the synaptic associations with mesoaccumbens and mesocortical neurons. *The*  
853 *Journal of neuroscience : the official journal of the Society for Neuroscience* 20, 3864-3873.
- 854 Cohen, J.Y., Amoroso, M.W., and Uchida, N. (2015). Serotonergic neurons signal reward and punishment  
855 on multiple timescales. *Elife* 4.
- 856 Cohen, J.Y., Haesler, S., Vong, L., Lowell, B.B., and Uchida, N. (2012). Neuron-type-specific signals for  
857 reward and punishment in the ventral tegmental area. *Nature* 482, 85-88.
- 858 Dejean, C., Courtin, J., Karalis, N., Chaudun, F., Wurtz, H., Bienvenu, T.C., and Herry, C. (2016). Prefrontal  
859 neuronal assemblies temporally control fear behaviour. *Nature* 535, 420-424.
- 860 Eshel, N., Bukwich, M., Rao, V., Hemmelder, V., Tian, J., and Uchida, N. (2015). Arithmetic and local  
861 circuitry underlying dopamine prediction errors. *Nature* 525, 243-246.

862 Eshel, N., Tian, J., Bukwich, M., and Uchida, N. (2016). Dopamine neurons share common response  
863 function for reward prediction error. *Nat Neurosci* 19, 479-486.

864 Fiorillo, C.D., Song, M.R., and Yun, S.R. (2013). Multiphasic temporal dynamics in responses of midbrain  
865 dopamine neurons to appetitive and aversive stimuli. *J Neurosci* 33, 4710-4725.

866 Fries, P. (2015). Rhythms for Cognition: Communication through Coherence. *Neuron* 88, 220-235.

867 Fujisawa, S., Amarasingham, A., Harrison, M.T., and Buzsaki, G. (2008). Behavior-dependent short-term  
868 assembly dynamics in the medial prefrontal cortex. *Nature neuroscience* 11, 823-833.

869 Fujisawa, S., and Buzsaki, G. (2011). A 4 Hz oscillation adaptively synchronizes prefrontal, VTA, and  
870 hippocampal activities. *Neuron* 72, 153-165.

871 Gillan, C.M., Kosinski, M., Whelan, R., Phelps, E.A., and Daw, N.D. (2016). Characterizing a psychiatric  
872 symptom dimension related to deficits in goal-directed control. *Elife* 5.

873 Grace, A.A., and Bunney, B.S. (1984). The control of firing pattern in nigral dopamine neurons: single  
874 spike firing. *The Journal of neuroscience : the official journal of the Society for Neuroscience* 4, 2866-  
875 2876.

876 Granger, C.W.J. (1969). Investigating causal relations by econometric models and cross-spectral  
877 methods. *Econometrica* 37, 424-438.

878 Gunaydin, L.A., Grosenick, L., Finkelstein, J.C., Kauvar, I.V., Fenno, L.E., Adhikari, A., Lammel, S.,  
879 Mirzabekov, J.J., Airan, R.D., Zalocusky, K.A., *et al.* (2014). Natural neural projection dynamics underlying  
880 social behavior. *Cell* 157, 1535-1551.

881 Harris, A.Z., and Gordon, J.A. (2015). Long-range neural synchrony in behavior. *Annu Rev Neurosci* 38,  
882 171-194.

883 Hartley, C.A., and Phelps, E.A. (2012). Anxiety and decision-making. *Biol Psychiatry* 72, 113-118.

884 Howe, M.W., and Dombeck, D.A. (2016). Rapid signalling in distinct dopaminergic axons during  
885 locomotion and reward. *Nature* 535, 505-510.

886 Hyman, J.M., Zilli, E.A., Paley, A.M., and Hasselmo, M.E. (2005). Medial prefrontal cortex cells show  
887 dynamic modulation with the hippocampal theta rhythm dependent on behavior. *Hippocampus* 15, 739-  
888 749.

889 Jia, X., Xing, D., and Kohn, A. (2013). No consistent relationship between gamma power and peak  
890 frequency in macaque primary visual cortex. *J Neurosci* 33, 17-25.

891 Jones, M.W., and Wilson, M.A. (2005). Theta rhythms coordinate hippocampal-prefrontal interactions in  
892 a spatial memory task. *PLoS Biol* 3, e402.

893 Joshua, M., Adler, A., Mitelman, R., Vaadia, E., and Bergman, H. (2008). Midbrain dopaminergic neurons  
894 and striatal cholinergic interneurons encode the difference between reward and aversive events at  
895 different epochs of probabilistic classical conditioning trials. *J Neurosci* 28, 11673-11684.

896 Karalis, N., Dejean, C., Chaudun, F., Khoder, S., Rozeske, R.R., Wurtz, H., Bagur, S., Benchenane, K.,  
897 Sirota, A., Courtin, J., and Herry, C. (2016a). 4-Hz oscillations synchronize prefrontal-amygdala circuits  
898 during fear behavior. *Nature neuroscience*.

899 Karalis, N., Dejean, C., Chaudun, F., Khoder, S., Rozeske, R.R., Wurtz, H., Bagur, S., Benchenane, K.,  
900 Sirota, A., Courtin, J., and Herry, C. (2016b). 4-Hz oscillations synchronize prefrontal-amygdala circuits  
901 during fear behavior. *Nat Neurosci* 19, 605-612.

902 Keren, G.L., C. (1979). Partial omega squared for ANOVA designs. *Educational and Psychological*  
903 *Measurement* 39.

904 Kim, Y., Simon, N.W., Wood, J., and Moghaddam, B. (2015). Reward Anticipation Is Encoded Differently  
905 by Adolescent Ventral Tegmental Area Neurons. *Biological psychiatry*.

906 Kim, Y., Wood, J., and Moghaddam, B. (2012). Coordinated activity of ventral tegmental neurons adapts  
907 to appetitive and aversive learning. *PLoS One* 7, e29766.

- 908 Kobayashi, S., Nomoto, K., Watanabe, M., Hikosaka, O., Schultz, W., and Sakagami, M. (2006). Influences  
909 of rewarding and aversive outcomes on activity in macaque lateral prefrontal cortex. *Neuron* 51, 861-  
910 870.
- 911 Kobayashi, S., and Schultz, W. (2014). Reward contexts extend dopamine signals to unrewarded stimuli.  
912 *Curr Biol* 24, 56-62.
- 913 Kumar, S., Hultman, R., Hughes, D., Michel, N., Katz, B.M., and Dzirasa, K. (2014). Prefrontal cortex  
914 reactivity underlies trait vulnerability to chronic social defeat stress. *Nat Commun* 5, 4537.
- 915 Lammel, S., Lim, B.K., Ran, C., Huang, K.W., Betley, M.J., Tye, K.M., Deisseroth, K., and Malenka, R.C.  
916 (2012). Input-specific control of reward and aversion in the ventral tegmental area. *Nature* 491, 212-  
917 217.
- 918 Lee, D. (2013). Decision making: from neuroscience to psychiatry. *Neuron* 78, 233-248.
- 919 Likhtik, E., Stujenske, J.M., Topiwala, M.A., Harris, A.Z., and Gordon, J.A. (2014). Prefrontal entrainment  
920 of amygdala activity signals safety in learned fear and innate anxiety. *Nature neuroscience* 17, 106-113.
- 921 Margolis, E.B., Lock, H., Hjelmstad, G.O., and Fields, H.L. (2006). The ventral tegmental area revisited: is  
922 there an electrophysiological marker for dopaminergic neurons? *J Physiol* 577, 907-924.
- 923 Matsumoto, H., Tian, J., Uchida, N., and Watabe-Uchida, M. (2016). Midbrain dopamine neurons signal  
924 aversion in a reward-context-dependent manner. *Elife* 5.
- 925 Matsumoto, M., and Hikosaka, O. (2009). Two types of dopamine neuron distinctly convey positive and  
926 negative motivational signals. *Nature* 459, 837-841.
- 927 Matsumoto, M., Matsumoto, K., Abe, H., and Tanaka, K. (2007). Medial prefrontal cell activity signaling  
928 prediction errors of action values. *Nat Neurosci* 10, 647-656.
- 929 Mileykovskiy, B., and Morales, M. (2011). Duration of inhibition of ventral tegmental area dopamine  
930 neurons encodes a level of conditioned fear. *J Neurosci* 31, 7471-7476.
- 931 Mineka, S., Watson, D., and Clark, L.A. (1998). Comorbidity of anxiety and unipolar mood disorders.  
932 *Annu Rev Psychol* 49, 377-412.
- 933 Mirenowicz, J., and Schultz, W. (1996). Preferential activation of midbrain dopamine neurons by  
934 appetitive rather than aversive stimuli. *Nature* 379, 449-451.
- 935 Moghaddam, B., Roth, R.H., and Bunney, B.S. (1990). Characterization of dopamine release in the rat  
936 medial prefrontal cortex as assessed by in vivo microdialysis: comparison to the striatum. *Neuroscience*  
937 36, 669-676.
- 938 Nomoto, K., Schultz, W., Watanabe, T., and Sakagami, M. (2010). Temporally extended dopamine  
939 responses to perceptually demanding reward-predictive stimuli. *J Neurosci* 30, 10692-10702.
- 940 Oleson, E.B., Gentry, R.N., Chioma, V.C., and Cheer, J.F. (2012). Subsecond dopamine release in the  
941 nucleus accumbens predicts conditioned punishment and its successful avoidance. *J Neurosci* 32, 14804-  
942 14808.
- 943 Park, J., Wood, J., Bondi, C., Del Arco, A., and Moghaddam, B. (2016). Anxiety Evokes Hypofrontality and  
944 Disrupts Rule-Relevant Encoding by Dorsomedial Prefrontal Cortex Neurons. *J Neurosci* 36, 3322-3335.
- 945 Parker, K.L., Chen, K.H., Kingyon, J.R., Cavanagh, J.F., and Narayanan, N.S. (2014). D1-dependent 4 Hz  
946 oscillations and ramping activity in rodent medial frontal cortex during interval timing. *The Journal of*  
947 *neuroscience : the official journal of the Society for Neuroscience* 34, 16774-16783.
- 948 Parker, N.F., Cameron, C.M., Taliaferro, J.P., Lee, J., Choi, J.Y., Davidson, T.J., Daw, N.D., and Witten, I.B.  
949 (2016). Reward and choice encoding in terminals of midbrain dopamine neurons depends on striatal  
950 target. *Nat Neurosci* 19, 845-854.
- 951 Paxinos, G., and Watson, C. (1998). *The rat brain in stereotaxic coordinates*. Academic Press.
- 952 Powell, N.J., and Redish, A.D. (2016). Representational changes of latent strategies in rat medial  
953 prefrontal cortex precede changes in behaviour. *Nat Commun* 7, 12830.
- 954 Rich, E.L., and Shapiro, M. (2009). Rat prefrontal cortical neurons selectively code strategy switches. *J*  
955 *Neurosci* 29, 7208-7219.

- 956 Roeper, J. (2013). Dissecting the diversity of midbrain dopamine neurons. *Trends Neurosci* 36, 336-342.
- 957 Roesch, M.R., Calu, D.J., and Schoenbaum, G. (2007). Dopamine neurons encode the better option in  
958 rats deciding between differently delayed or sized rewards. *Nat Neurosci* 10, 1615-1624.
- 959 Roitman, M.F., Wheeler, R.A., Wightman, R.M., and Carelli, R.M. (2008). Real-time chemical responses in  
960 the nucleus accumbens differentiate rewarding and aversive stimuli. *Nat Neurosci* 11, 1376-1377.
- 961 Schultz, W. (1998). Predictive reward signal of dopamine neurons. *J Neurophysiol* 80, 1-27.
- 962 Schultz, W. (2016). Dopamine reward prediction-error signalling: a two-component response. *Nat Rev*  
963 *Neurosci* 17, 183-195.
- 964 Schultz, W., Apicella, P., and Ljungberg, T. (1993). Responses of monkey dopamine neurons to reward  
965 and conditioned stimuli during successive steps of learning a delayed response task. *J Neurosci* 13, 900-  
966 913.
- 967 Schultz, W., and Romo, R. (1987). Responses of nigrostriatal dopamine neurons to high-intensity  
968 somatosensory stimulation in the anesthetized monkey. *Journal of neurophysiology* 57, 201-217.
- 969 Seo, H., and Lee, D. (2009). Behavioral and neural changes after gains and losses of conditioned  
970 reinforcers. *J Neurosci* 29, 3627-3641.
- 971 Siapas, A.G., Lubenov, E.V., and Wilson, M.A. (2005). Prefrontal phase locking to hippocampal theta  
972 oscillations. *Neuron* 46, 141-151.
- 973 Sirota, A., Montgomery, S., Fujisawa, S., Isomura, Y., Zugaro, M., and Buzsaki, G. (2008). Entrainment of  
974 neocortical neurons and gamma oscillations by the hippocampal theta rhythm. *Neuron* 60, 683-697.
- 975 Somerville, L.H., Wagner, D.D., Wig, G.S., Moran, J.M., Whalen, P.J., and Kelley, W.M. (2013).  
976 Interactions between transient and sustained neural signals support the generation and regulation of  
977 anxious emotion. *Cereb Cortex* 23, 49-60.
- 978 Spellman, T., Rigotti, M., Ahmari, S.E., Fusi, S., Gogos, J.A., and Gordon, J.A. (2015). Hippocampal-  
979 prefrontal input supports spatial encoding in working memory. *Nature* 522, 309-314.
- 980 Tan, K.R., Yvon, C., Turiault, M., Mirzabekov, J.J., Doehner, J., Labouebe, G., Deisseroth, K., Tye, K.M.,  
981 and Luscher, C. (2012). GABA neurons of the VTA drive conditioned place aversion. *Neuron* 73, 1173-  
982 1183.
- 983 Thierry, A.M., Tassin, J.P., Blanc, G., and Glowinski, J. (1976). Selective activation of mesocortical DA  
984 system by stress. *Nature* 263, 242-244.
- 985 Valenti, O., Lodge, D.J., and Grace, A.A. (2011). Aversive stimuli alter ventral tegmental area dopamine  
986 neuron activity via a common action in the ventral hippocampus. *The Journal of neuroscience : the*  
987 *official journal of the Society for Neuroscience* 31, 4280-4289.
- 988 van Zessen, R., Phillips, J.L., Budygin, E.A., and Stuber, G.D. (2012). Activation of VTA GABA neurons  
989 disrupts reward consumption. *Neuron* 73, 1184-1194.
- 990 Wenzel, J.M., Rauscher, N.A., Cheer, J.F., and Oleson, E.B. (2015). A role for phasic dopamine release  
991 within the nucleus accumbens in encoding aversion: a review of the neurochemical literature. *ACS Chem*  
992 *Neurosci* 6, 16-26.
- 993 Wise, R.A. (2004). Dopamine, learning and motivation. *Nat Rev Neurosci* 5, 483-494.
- 994 Ye, L., Allen, W.E., Thompson, K.R., Tian, Q., Hsueh, B., Ramakrishnan, C., Wang, A.C., Jennings, J.H.,  
995 Adhikari, A., Halpern, C.H., *et al.* (2016). Wiring and Molecular Features of Prefrontal Ensembles  
996 Representing Distinct Experiences. *Cell* 165, 1776-1788.

## Fig. 1

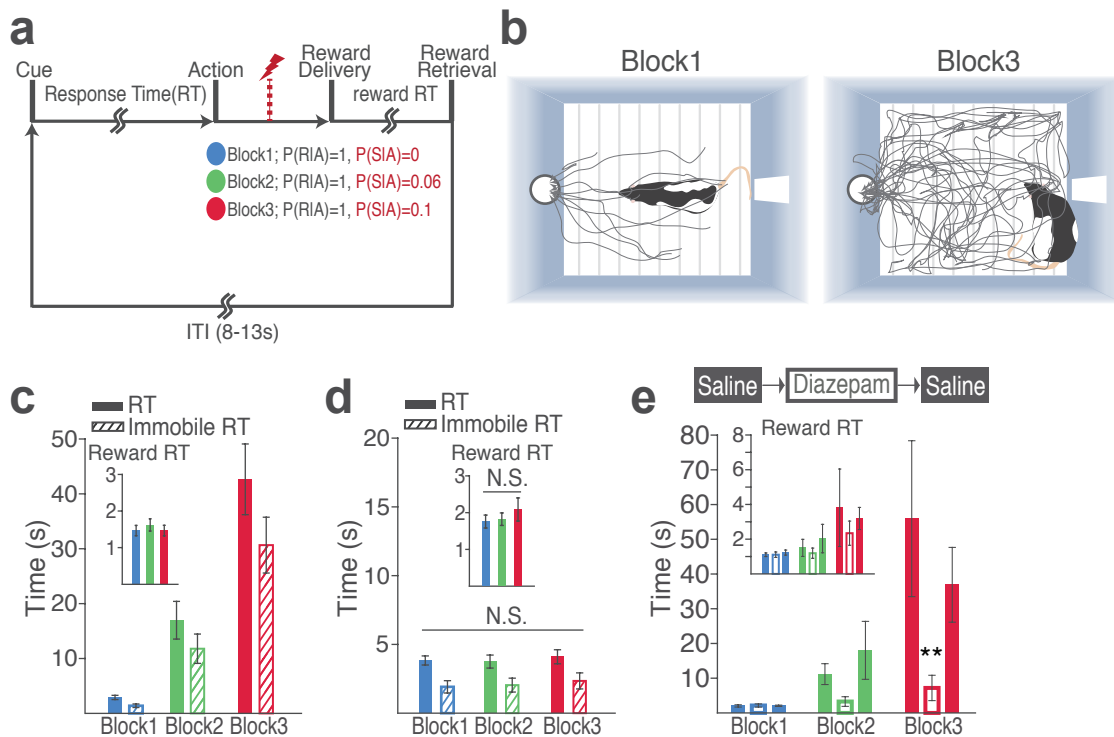

Figure 1. Punishment induces anxiety-like changes in reward-seeking behavior. (a) A schematic diagram illustrating the task. (b) Representative behavioral trajectories in block 1 (left, 10 trials) and block 3 (right, 10 trials). (c) Significant increases in RT (filled bars) and immobile RT (slashed bars) were observed as a function of punishment contingency. (Inset) Latency from reward delivery to retrieval (reward RT) did not differ across blocks. (d) RT, immobile RT, and reward RT did not change across blocks in the absence of punishment. (e) Animals performed three sessions of the task with pretreatment of saline (Day 1) – diazepam (2 mg/kg) – saline (Day 2). Pretreatment of an anxiolytic diazepam (2 mg/kg) but not saline injection averted punishment-induced increase in the mean RT. \*\* $p < 0.005$ ; post hoc test. (Inset) Injections did not influence reward RT.

## Fig. 2

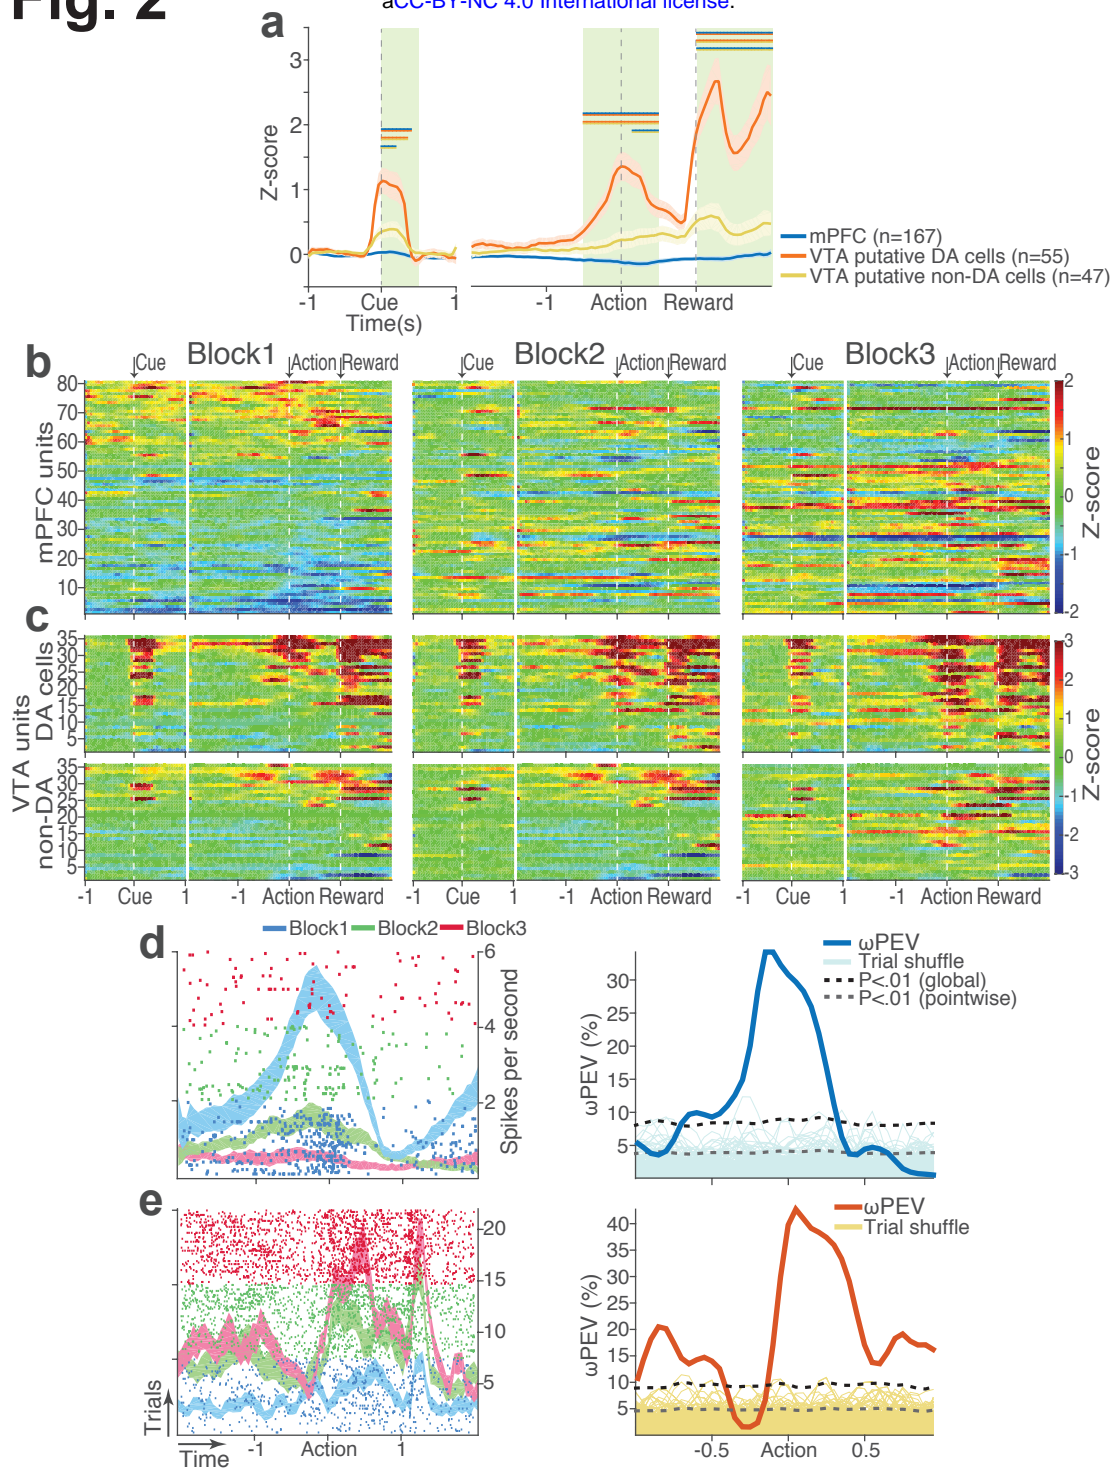

Figure 2. mPFC, VTA DA, and non-DA single units respond to task events and punishment. (a) Peri-event activity averaged across all trials and all units within each neuron group. Dual-colored bars above indicate significant pairwise differences at corresponding time bins according to the post hoc analysis ( $p < 0.05$ ). The green shadows indicate time windows of statistical analyses. (b) Baseline-normalized peri-event firing rates of mPFC units are plotted per block to reveal neuronal responses to punishment. Only units with significant activity modulation are plotted – i.e., punishment-encoding units (Figure S3). (c) Peri-event activity of VTA putative DA (top panels) and non-DA (bottom panels) punishment-encoding units. (d-e) Identification of single units discriminating their firing rates across different blocks as a function of punishment. (d) Left, A raster plot showing a representative mPFC unit's peri-action spike activity across blocks with spike density functions of different blocks superimposed. Right, To quantify each unit's encoding, percent variance in the unit's firing rate explained by blockwise change in punishment contingency ( $\omega$ PEV) was calculated. To determine the global  $\omega$ PEV band, trial-shuffled surrogate  $\omega$ PEV distribution (light blue curves) was acquired, and the pointwise and global  $\omega$ PEV bands were found from the distribution at  $\alpha = 0.01$  (Experimental procedure). A unit whose  $\omega$ PEV curve crosses the global band was determined as a punishment-encoding unit. (e) Left, A representative VTA unit's peri-action activity across blocks. Right, This VTA unit satisfied the punishment-encoding criterion.

## Fig. 3

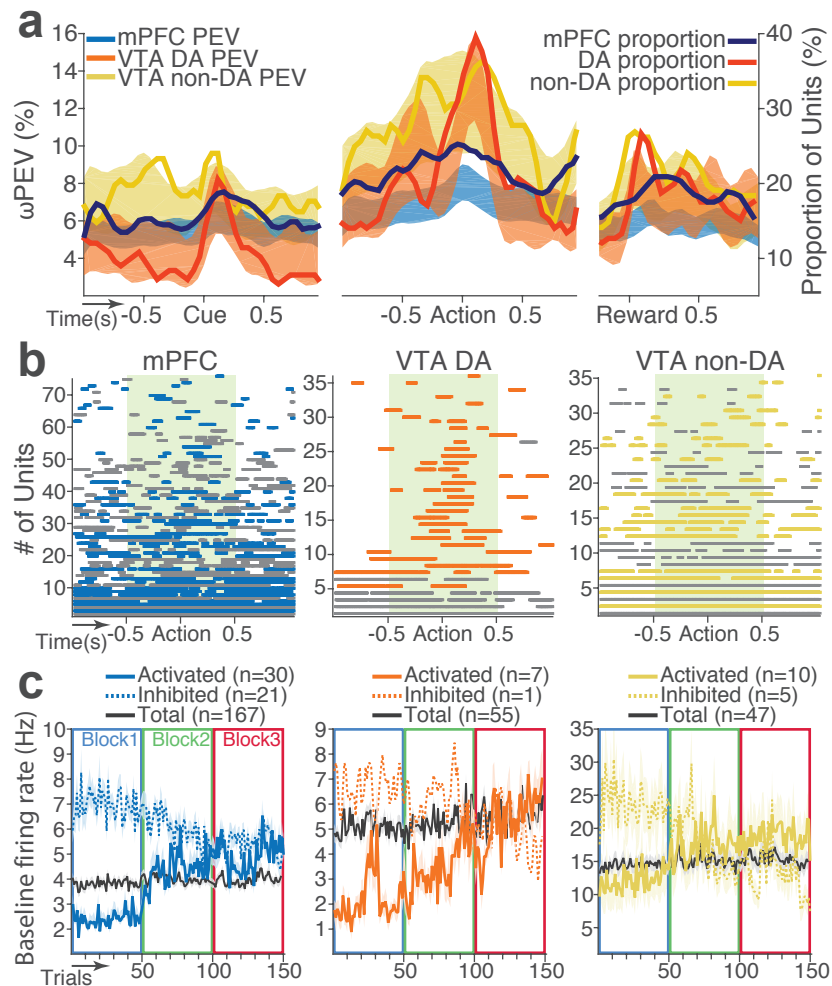

Figure 3. mPFC, VTA DA, and non-DA single units encode action-punishment contingency by modulating their peri-event and baseline firing rates. (a) Shaded area indicates the mean  $\pm$  s.e.m.  $\omega$ PEV averaged across all units in each neuron group (left vertical axis) across time. Line plots indicating proportions of punishment-encoding units are superimposed (right vertical axis). (b) To reveal time points of punishment encoding, crossing of the global  $\omega$ PEV band by each unit is marked with a line segment (Experimental procedure). Only the units with at least one crossing are included in each plot. Single units with significant change in their baseline firing rate are marked with gray lines (see below). (c) Subpopulations of single units represented punishment with significant excitatory or inhibitory modulation of their baseline (inter-trial interval) activity. The mean  $\pm$  s.e.m. baseline firing rates are plotted across trials and blocks.



## Fig. 4

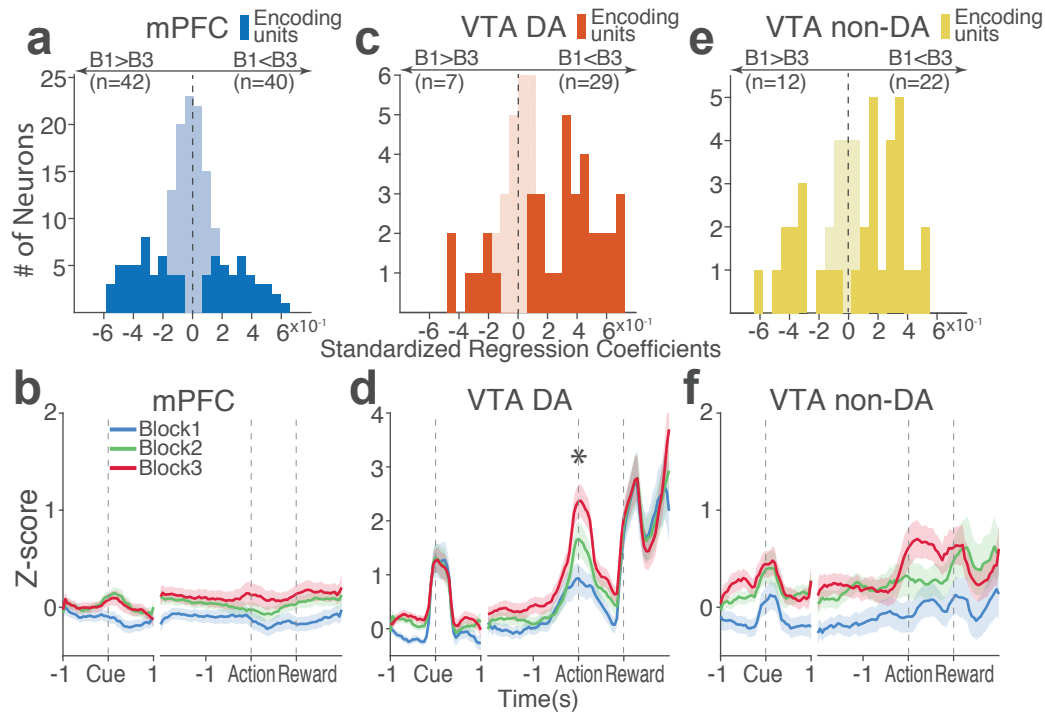

Figure 4. Distinct subpopulations of single units encode action-punishment contingency with excitatory or inhibitory activity modulation. (a, c, e) Units are distributed across the horizontal axis based on modulation of their peri-action activity across blocks as a function of punishment. Standardized regression coefficients (SRC) were computed for a normalized quantification of each unit's peri-action activity modulation by punishment (Experimental procedure). In each distribution, units with excitatory or inhibitory activity modulation are located in the right or left portion of the distribution, respectively. Punishment-encoding units are solid-colored, while non-encoding units are pale-colored. (a) Direction of the mPFC neuronal activity modulation. (b) The baseline-normalized activity of the mPFC encoding units per block (mean  $\pm$  s.e.m.). (c) Direction of the VTA DA neuronal activity modulation. (d) The activity of the VTA DA encoding units per block (mean  $\pm$  s.e.m.). Asterisk indicates a significant effect of block on the peri-action activity ( $p < 0.05$ ). (e) Direction of the VTA non-DA neuronal activity modulation. (f) The activity of the VTA non-DA encoding units per block (mean  $\pm$  s.e.m.).

## Fig. 5

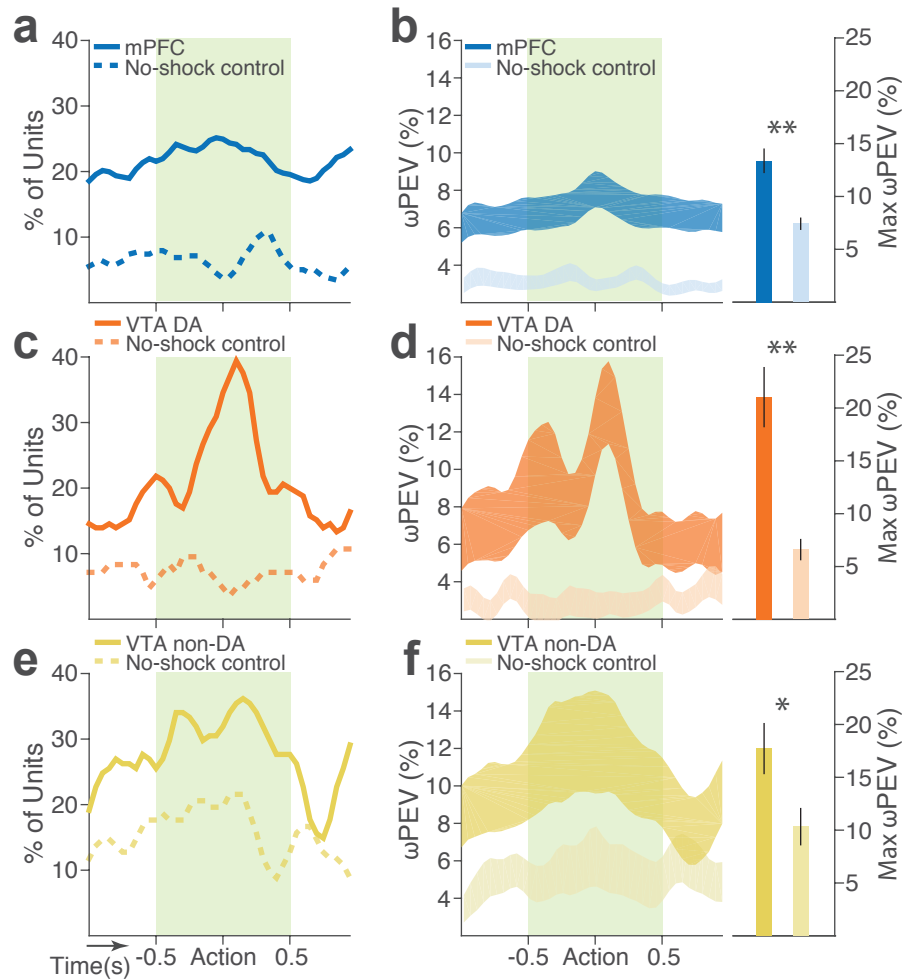

Figure 5. Blockwise firing rate changes in the presence vs absence of punishment contingency. (a) Proportion of mPFC units showing significant firing-rate changes across blocks during the peri-action epoch in the presence vs absence (no-shock control) of punishment. (b) Left, Percent variance in the mPFC unit firing rates explained by the block shift ( $\omega$ PEV) in the presence vs absence of punishment (mean  $\pm$  s.e.m.). Right, Maximum peri-action  $\omega$ PEV of mPFC units differed in the presence vs absence of punishment (Student's t-test,  $t_{291} = 3.81$ ,  $p < 0.001$ ). (c) Proportion of VTA DA units showing significant firing-rate changes across blocks. (d) Left,  $\omega$ PEV of VTA DA units. Right, Maximum peri-action  $\omega$ PEV of VTA DA units ( $t_{81} = 4.19$ ,  $p < 0.001$ ). (e) Proportion of VTA non-DA units showing significant firing-rate changes across blocks. (f) Left,  $\omega$ PEV of VTA non-DA units. Right, Maximum peri-action  $\omega$ PEV of VTA non-DA units ( $t_{74} = 2.25$ ,  $p = 0.028$ ). \* $p < 0.05$ , \*\* $p < 0.005$ .

## Fig. 6

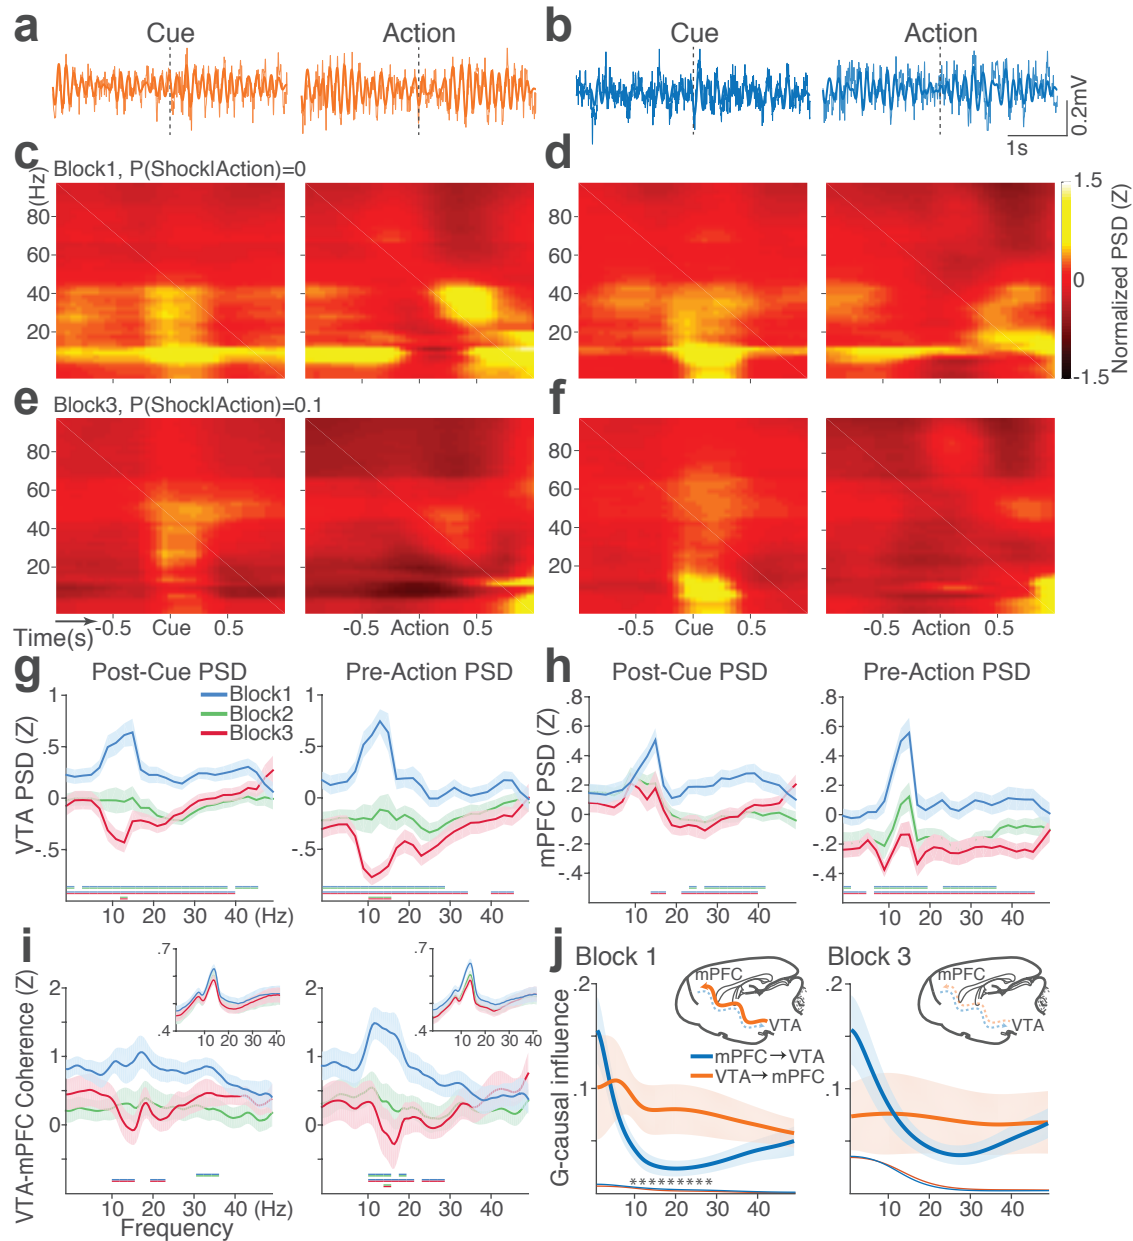

Figure 6. Punishment diminishes theta oscillation-mediated neural synchrony in the VTA-mPFC circuit. (a) Representative VTA peri-event LFP traces in a block 1 trial. Bandpass filtered LFP signal (heavy line) is superimposed on the raw trace (thin line). (b) Simultaneously recorded mPFC LFP traces. (c) Baseline-normalized VTA power spectrograms averaged across block 1 trials (left: peri-cue, right: pre-action). mPFC block 1 power spectrograms are in (d). (e) Diminished VTA theta power in block 3. (f) Similar diminishment observed in mPFC theta power. (g) Mean  $\pm$  s.e.m. (shaded area) normalized VTA PSDs per block corresponding to 1-s post-cue (left) and pre-action (right) epochs. Dual-colored bars below indicate significant pairwise differences at corresponding frequency bins according to post hoc analyses ( $p < 0.05$ ). (h) Normalized mPFC PSDs in post-cue (left) and pre-action (right) epochs. (i) Normalized VTA-mPFC LFP coherence in post-cue (left) and pre-action (right) epochs. Insets represent non-normalized LFP coherences of each block. (j) Granger-causality, representing mutual influences (directionality) between VTA and mPFC peri-action LFP time series in block 1 (left) and block 3 (right). Blue and orange curves represent mPFC-to-VTA and VTA-to-mPFC Granger-causal influences, respectively. Shaded areas indicate s.e.m. Thin colored-lines below indicate upper bounds of confidence intervals ( $\alpha = 0.001$ ) acquired by the random permutation resampling of time bins. Asterisk indicates significant difference between bidirectional Granger-causal influences at the corresponding frequency bin ( $p < 0.05$ ).

## Fig. 7

### Phase-locking of mPFC spikes to mPFC theta oscillation

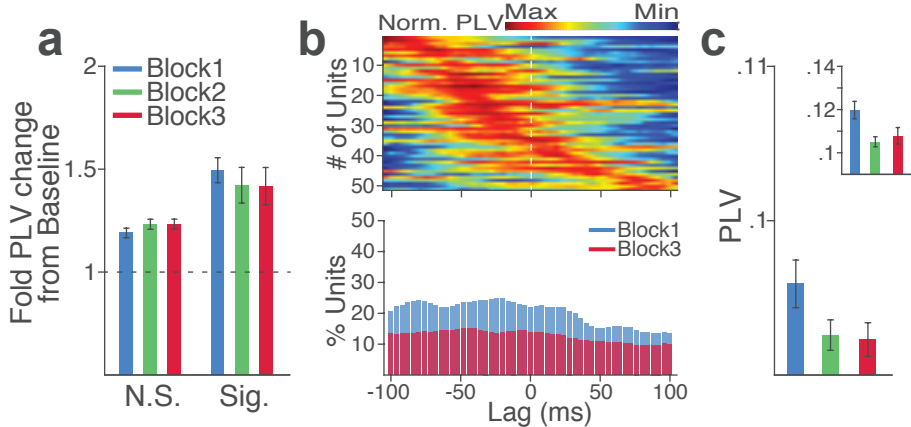

### Phase-locking of VTA spikes to VTA theta oscillation

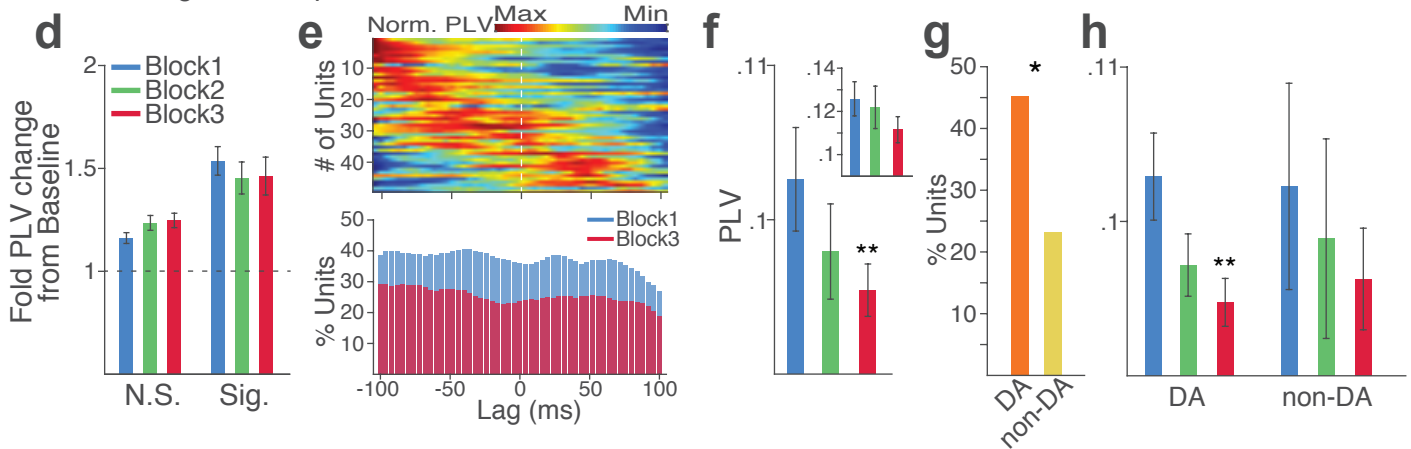

Figure 7. Contingency of punishment reduces VTA and mPFC neuronal synchrony to local theta oscillation. (a-c) Modulation of mPFC neuronal synchrony to mPFC theta oscillation. Phase-locking values (PLVs) were quantified by averaging 1,000 mean resultant lengths (MRLs) of the circular phase angle distribution comprising 100 resampled spikes per iteration (Experimental procedure). (a) Fold change from baseline in the strength of the neuronal phase-locking during peri-action epoch in units that passed Rayleigh z-test (Sig.) and rest of the units (N.S.). (b) Top, Normalized PLVs in block 1 across a range of time lags for all phase-locked mPFC units, aligned by peak lags. Bottom, Percentage of significantly phase-locked mPFC units in block 1 vs 3 across a range of lags. (c) Mean  $\pm$  s.e.m. PLVs across different blocks. Inset, PLVs including significantly phase-locked units only. (d-h) Modulation of VTA neuronal synchrony to VTA theta oscillation. (d) Fold change from baseline in the strength of the neuronal phase-locking. (e) Top, Normalized PLVs in block 1 of all phase-locked VTA units. Bottom, Percentage of significantly phase-locked VTA units. (f) Mean  $\pm$  s.e.m. PLVs across different blocks. (g) Percentage of phase-locked VTA DA and non-DA units. (h) PLVs of VTA DA and non-DA units plotted separately.

## Fig. 8

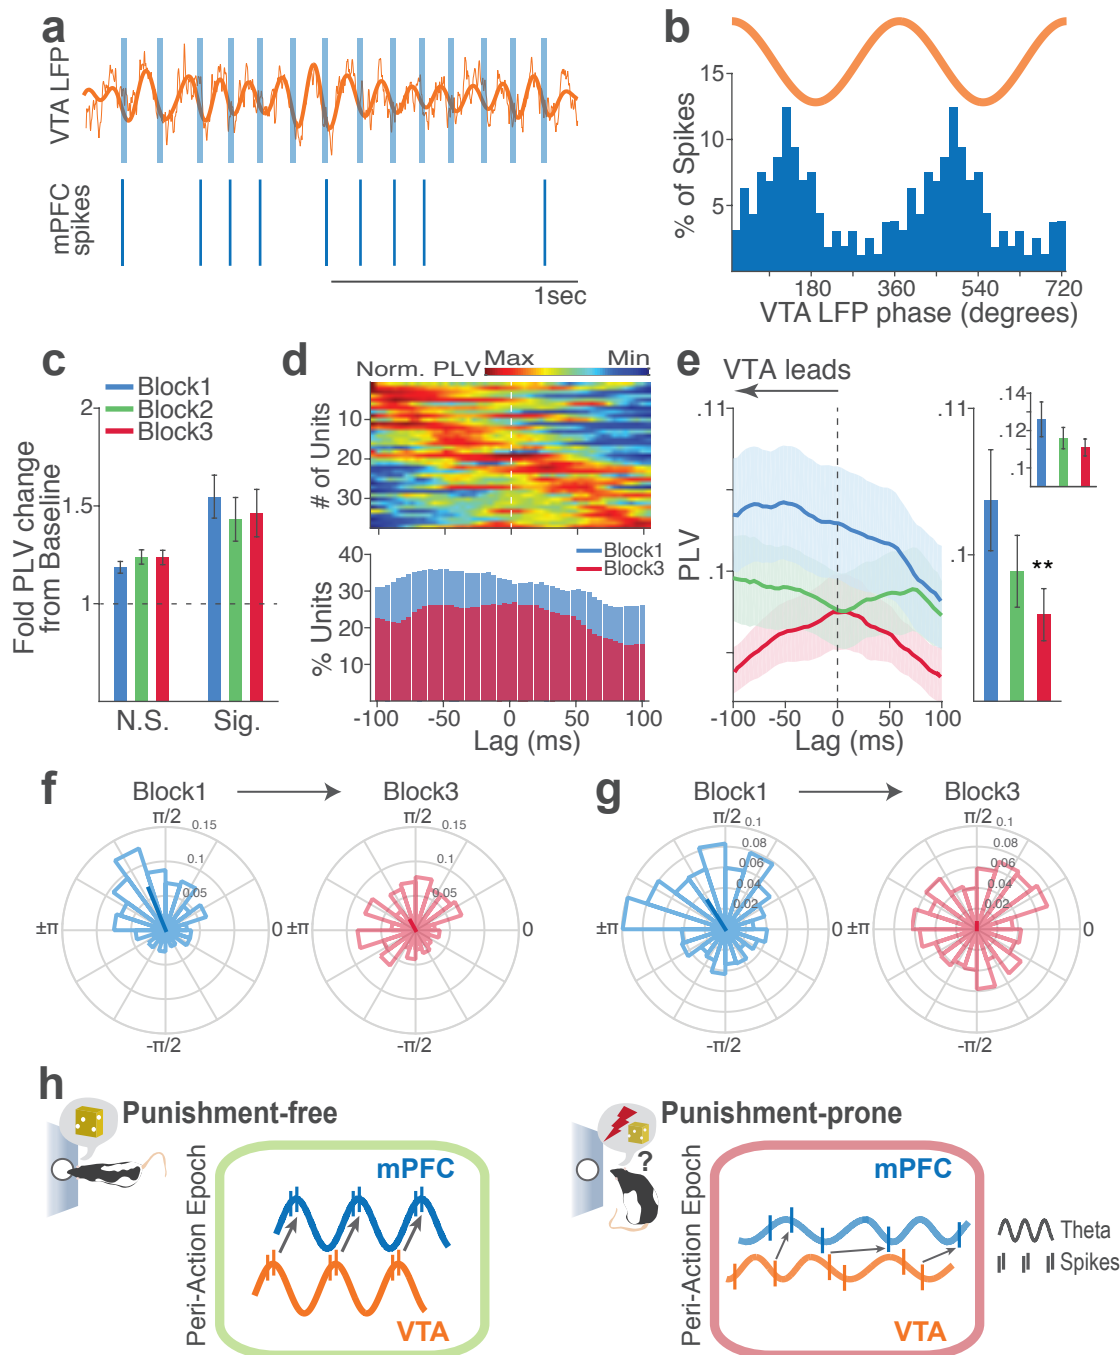

Figure 8. Contingency of punishment reduces mPFC neuronal synchrony to the VTA theta oscillation. (a) Top, Example raw (thin line) and bandpass filtered (heavy line) VTA LFP traces. Bottom, Neuronal spikes of a simultaneously recorded mPFC single unit. This unit's preferred phase is indicated with light blue columns superimposed on the LFP trace. (b) Distribution of spike phase angles of the example mPFC unit relative to the VTA theta oscillation (Rayleigh's  $p < 0.001$ ). (c) Fold change from baseline in the strength of mPFC neuronal phase-locking (PLV) during the peri-action epoch in units that passed Rayleigh z-test (Sig.) and rest of the units (N.S.). (d) Top, Normalized PLVs in block 1 across a range of time lags for all phase-locked mPFC units, aligned by peak lags. Bottom, Percentage of significantly phase-locked units in block 1 vs 3 (e) Left, PLVs calculated with negative and positive time lags applied to spike trains relative to LFP time series. Right, Mean  $\pm$  s.e.m. PLVs of all units across different blocks. Inset, PLVs including significantly phase-locked units only. (f-g) Polar plots represent the distribution of spike-phase angles of an example mPFC unit in block 1 vs 3. To quantify the circular concentration of phase angles, we calculated the mean resultant vector indicated as a superimposed bar on each polar plot. (h) At the neural circuit level, the theta-oscillation-mediated neural synchrony in the VTA-mPFC circuit that emerged during punishment-free actions declined during punishment-prone actions. Neural synchrony mediated by the theta oscillation may subserve binding of the VTA-mPFC neurons responding to the appetitive action into the "appetitive" neural network. Our observation of decline in theta-mediated neural synchrony may reflect reduced activation of the appetitive neural network in the presence of punishment contingency.

## Fig. S1

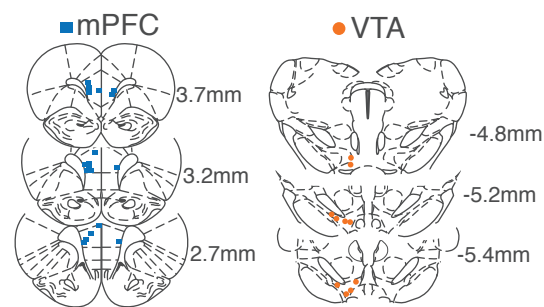

Supplementary Figure 1. Histologically verified placements of mPFC and VTA electrodes. We recorded activity of ipsilateral VTA and mPFC (N=10) or bilateral mPFC (N=4). Coordinates are relative to the bregma.

## Fig. S2

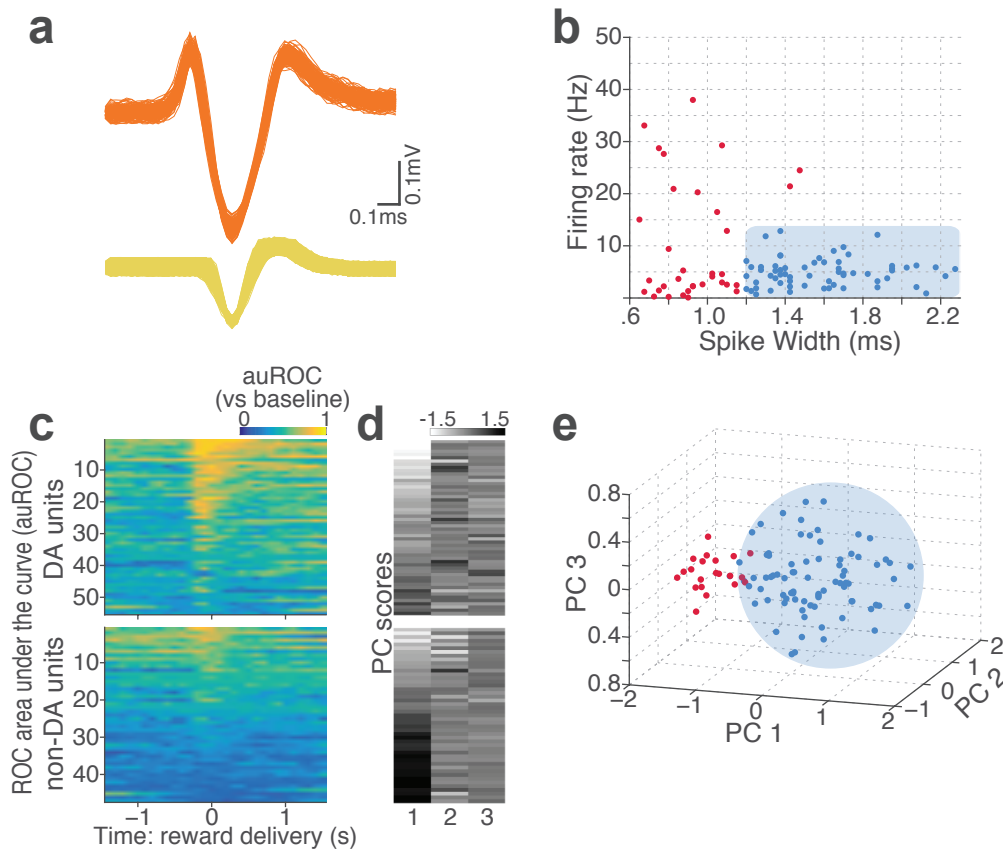

Supplementary Figure 2. Classification of VTA single units to putative DA or putative non-DA units. (a) Representative spike waveforms of a putative DA (top) and a non-DA (bottom) units. (b) Units were first classified based on their mean baseline firing rate and width of the spike waveform. Units whose mean baseline firing rate slower than 12 Hz, waveform width greater than 1.2 ms were considered to be putative DA units (blue circles). (c) To characterize each unit's reward response, ROC curves were calculated by comparing the firing-rate distributions of reward delivery vs baseline epochs. (d) Principal component analysis (PCA) was conducted on auROC values. (e) Units were mapped onto a 3-d space comprising the top three principal components. Unsupervised clustering was conducted by fitting Gaussian mixture models which yielded two clusters of units: one with phasic excitation to reward (blue circles), the other with sustained excitation or suppression to reward (red circles). Units in the former cluster were classified as putative DA units. Only the units satisfying both criteria (b) and (e) were finally labelled as putative DA units, and the rest of units were putative non-DA units.

## Fig. S3

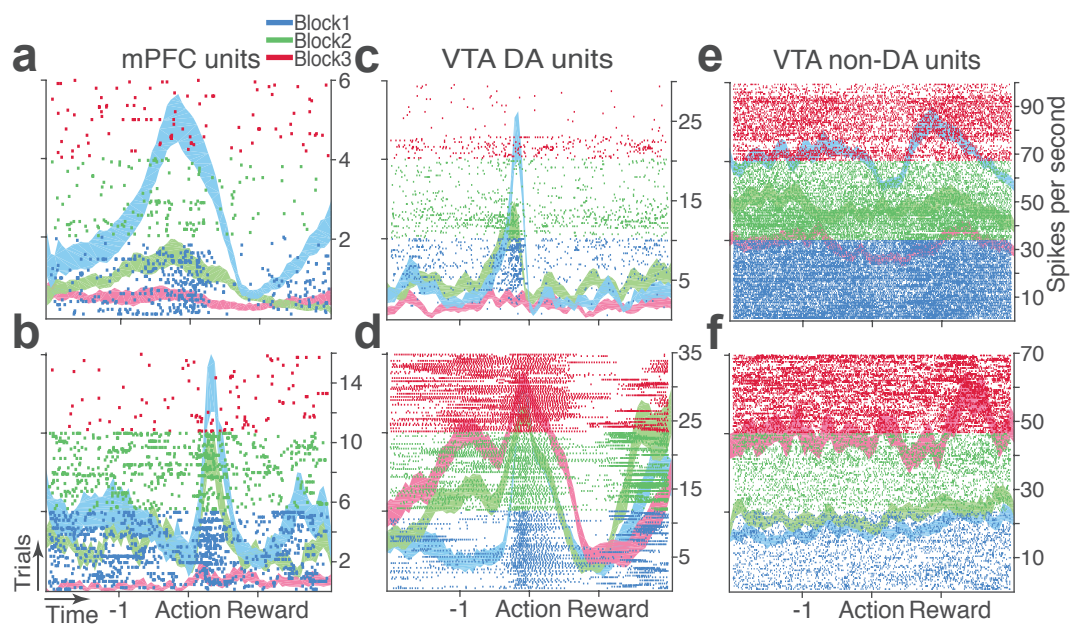

Supplementary Figure 3. Representative punishment-encoding mPFC (a-b), VTA DA (c-d), and non-DA (e-f) single units. In each plot, data are for 150 trials of action with three different levels of punishment contingency. Each row represents each trial. Ticks mark spike times. The horizontal axis represents time around the action occurring at time = 0. Spike density functions of different blocks are superimposed as mean  $\pm$  s.e.m. (shaded area).



## Fig. S4

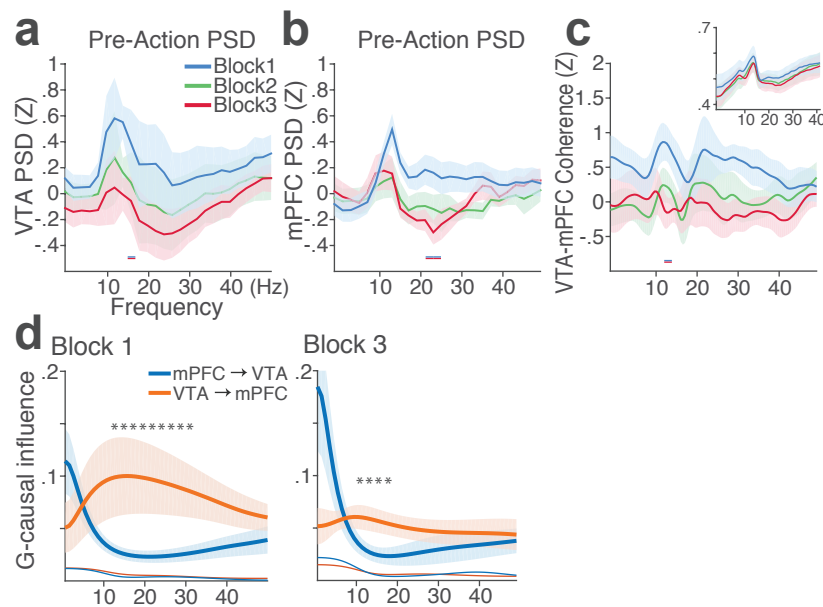

Supplementary Figure 4. mPFC and VTA theta oscillations did not change across blocks in the absence of punishment. (a) Mean  $\pm$  s.e.m. (shaded area) normalized VTA PSDs of each block corresponding to 1 s pre-action epoch. Dual-colored bars below indicate significant pairwise differences at corresponding frequency bins according to post hoc analyses ( $p < 0.05$ ). (b) Normalized mPFC PSDs. (c) Normalized VTA-mPFC LFP coherence of each block in the pre-action epoch. Insets represent non-normalized LFP coherences. (d) Granger-causality, representing mutual influences (directionality) between VTA and mPFC peri-action LFP time series in block 1 (left) & 3 (right). Blue and orange curves represent mPFC-to-VTA and VTA-to-mPFC Granger-causal influences, respectively. Shaded areas indicate s.e.m. Thin colored-lines below indicate upper bounds of confidence intervals ( $\alpha = 0.001$ ) acquired by the random permutation resampling of time bins. An asterisk indicates significant difference between bidirectional Granger-causal influences at the corresponding frequency bin ( $p < 0.05$ ).

## Fig. S5

Phase-locking of VTA spikes to mPFC theta oscillation

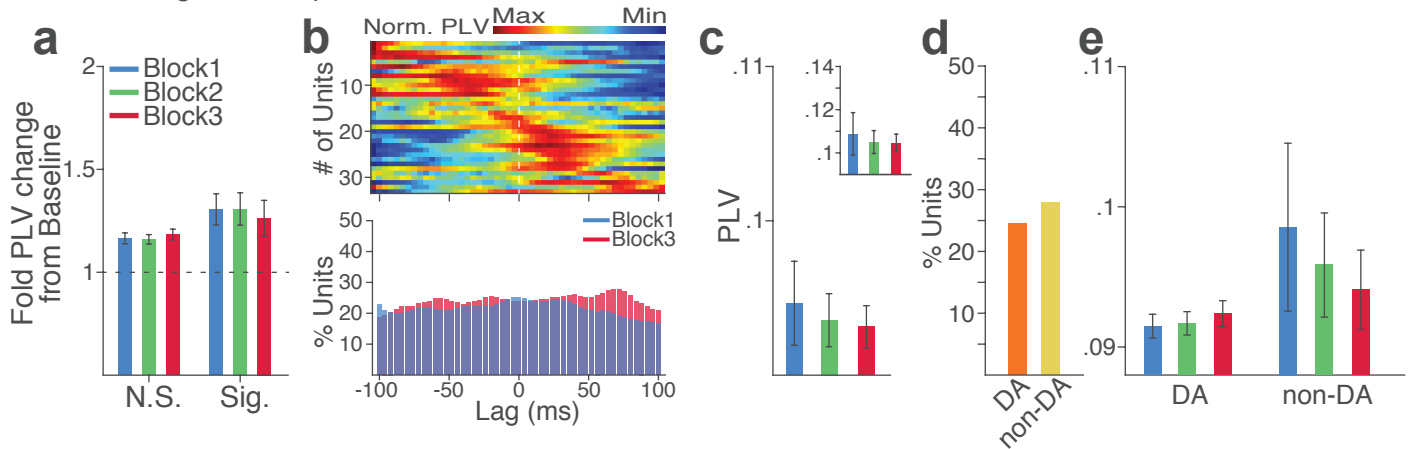

Supplementary Figure 5. VTA single units show weak phase synchrony to the mPFC theta oscillation. (a) Fold change from baseline in the strength of the neuronal phase-locking. (b) Top, Normalized PLVs in block 1 for all phase-locked VTA units. The phase-locked units displayed their peak PLVs with negative or positive time lags, indicating weak phase modulation of VTA spike activity by the mPFC theta oscillation (Signed-rank test,  $p = 0.129$ ). Bottom, Percentage of significantly phase-locked VTA units did not differ across blocks. (c) Mean  $\pm$  s.e.m. PLVs across different blocks. No significant change was found across blocks (Signed-rank test,  $p$  values  $> 0.33$ ). (d) Percentage of phase-locked VTA DA vs non-DA units. (e) PLVs of VTA DA and non-DA units plotted separately. PLVs did not differ across blocks in both VTA cell types (Signed-rank test,  $p$  values  $> 0.25$ ).

## Fig. S6

### Phase-locking of mPFC spikes to mPFC theta oscillation

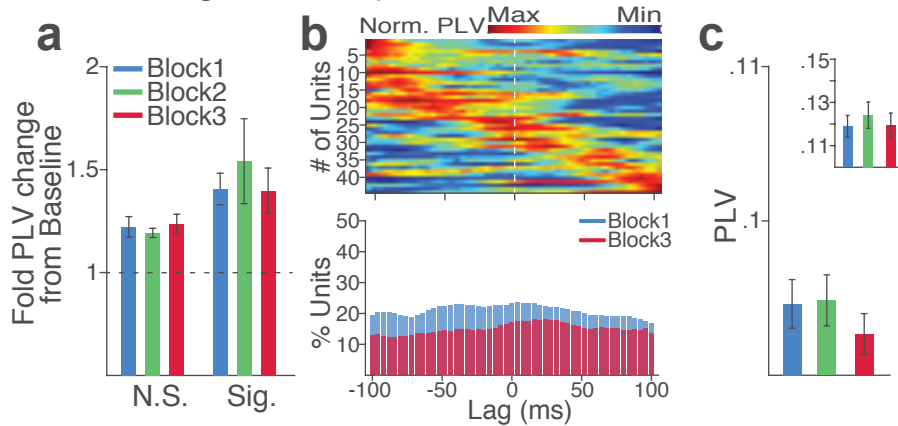

### Phase-locking of mPFC spikes to VTA theta oscillation

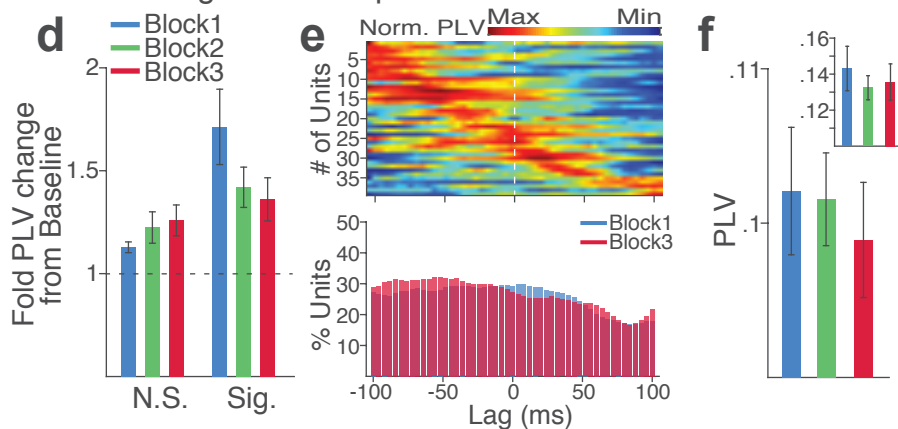

Supplementary Figure 6. mPFC neuronal synchrony to mPFC and VTA theta oscillations did not change across blocks in the absence of punishment (No-shock control). (a-c) mPFC neuronal phase-locking to mPFC theta oscillation. (a) Fold change from baseline in the strength of the neuronal phase-locking during peri-action epoch in units that passed Rayleigh z-test (Sig.) and rest of the units (N.S.). (b) Top, Normalized PLVs in block 1 across a range of time lags for all phase-locked mPFC units, aligned by peak lags. Bottom, Percentage of significantly phase-locked mPFC units in block 1 vs 3 across a range of lags. (c) Mean  $\pm$  s.e.m. PLVs across different blocks. Inset, PLVs including significantly phase-locked units only. The PLVs did not significantly differ across blocks (Signed-rank test,  $p$  values  $> 0.105$ ). (d-f) mPFC neuronal phase-locking to the VTA theta oscillation. The PLVs did not significantly differ across blocks (Signed-rank test,  $p$  values  $> 0.392$ ).

## Fig. S7

### Phase-locking of VTA spikes to VTA theta oscillation

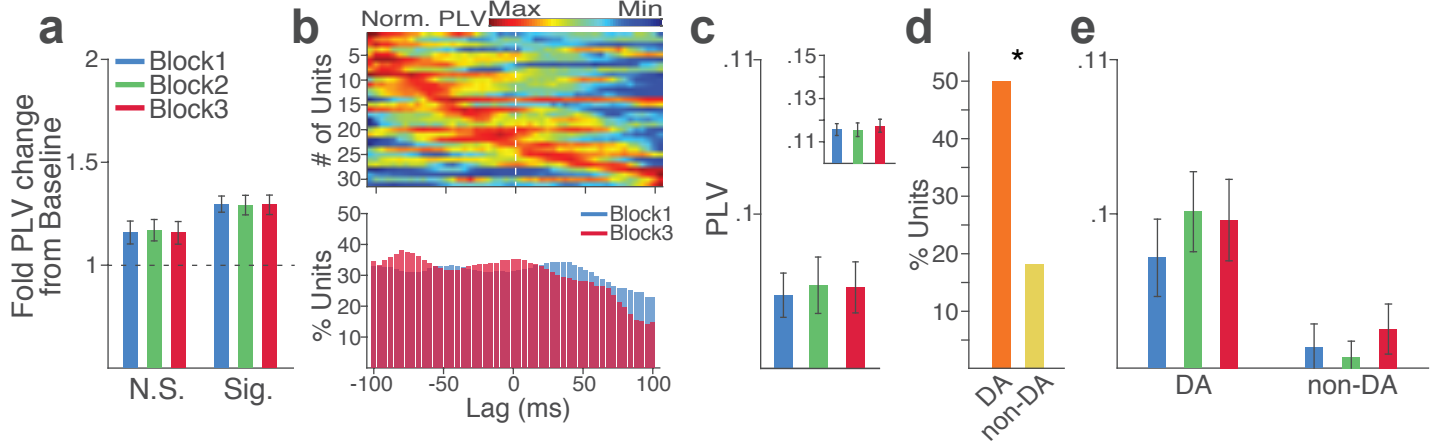

### Phase-locking of VTA spikes to mPFC theta oscillation

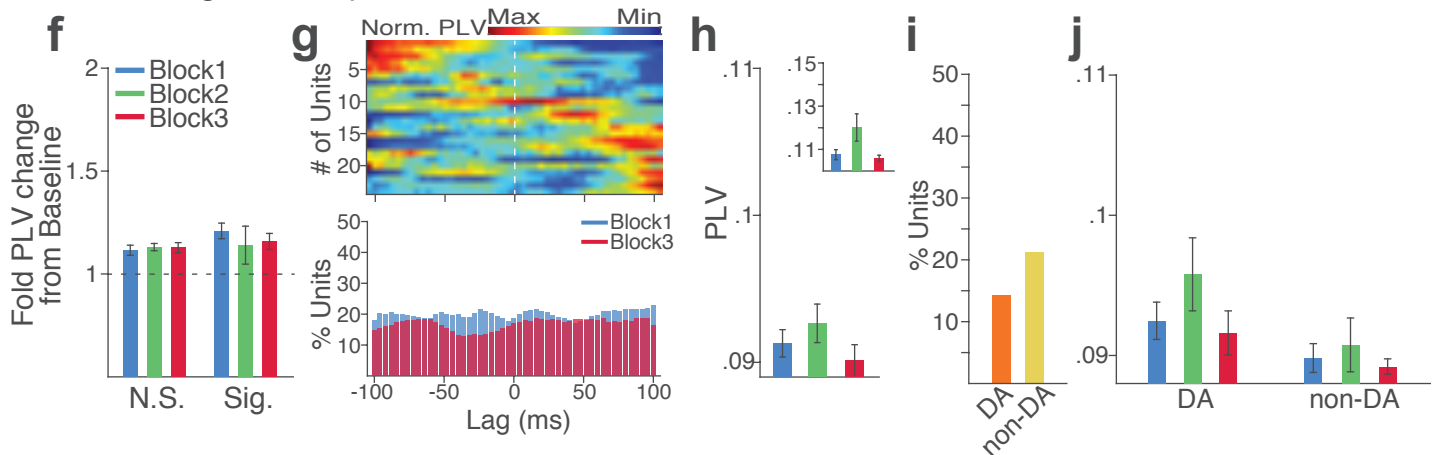

Supplementary Figure 7. VTA neuronal synchrony to VTA and mPFC theta oscillations did not change across blocks in the absence of punishment (No-shock control). (a-e) VTA neuronal phase-locking to the VTA theta oscillation. (a) Fold change from baseline in the strength of the neuronal phase-locking during peri-action epoch in units that passed Rayleigh z-test (Sig.) and rest of the units (N.S.). (b) Top, Normalized PLVs in block 1 across a range of time lags for all phase-locked VTA units, aligned by s. Bottom, Percentage of significantly phase-locked VTA units in block 1 vs 3 across a range of lags. (c) Mean  $\pm$  s.e.m. PLVs across different blocks. The PLVs did not significantly differ across blocks (Signed-rank test, p values  $> 0.743$ ). Inset, PLVs including significantly phase-locked units only. (d) Percentage of phase-locked VTA DA vs non-DA units. Greater fraction of DA units (50%) appeared to be phase-locked to the VTA theta oscillation compared with non-DA units (18%) (Chi-square test,  $\chi^2_1 = 6.959$ ,  $p = 0.008$ ). (e) PLVs of VTA DA and non-DA units plotted separately. (f-j) VTA neuronal phase-locking to the mPFC theta oscillation. (h) The VTA neuronal phase-locking to the mPFC theta oscillation did not differ across blocks (Signed-rank test, p values  $> 0.355$ ). Conventions are same as above.
